# Supplementary material for: Extreme weather event attribution predicts climate policy support across the world
Source: Springer Nature journal article supplement (doi:10.1038/s41558-025-02372-4), 2025-07-01
Supplement: MOESM1 [file 41558_2025_2372_MOESM1_ESM.pdf]

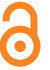

# Extreme weather event attribution predicts climate policy support across the world

---

In the format provided by the authors and unedited

## Table of Contents

|                                                                                                                                                                                                       |    |
|-------------------------------------------------------------------------------------------------------------------------------------------------------------------------------------------------------|----|
| Figure S1. Mean and standard errors of climate policy support (mean index), $N = 67,626$ .....                                                                                                        | 3  |
| Figure S2. Mean and standard errors of support for taxes on carbon intense foods, $N = 64,038$ .....                                                                                                  | 4  |
| Figure S3. Mean and standard errors of support for fuel taxes, $N = 64,203$ .....                                                                                                                     | 5  |
| Figure S4. Mean and standard errors of support for public transport, $N = 64,732$ .....                                                                                                               | 5  |
| Figure S5. Mean and standard errors of support for sustainable energy, $N = 64,278$ .....                                                                                                             | 6  |
| Figure S6. Mean and standard errors of support for protecting forested and land areas, $N = 63,566$ .....                                                                                             | 8  |
| Figure S7. Weighted linear multilevel models comparing effects across policy measures (aggregate, taxes, green transition) for each extreme weather event (random intercepts across countries). ..... | 9  |
| Figure S8. Effect of male gender on climate policy support across countries. ....                                                                                                                     | 10 |
| Figure S9. Mean and standard errors of subjective attribution across countries, $N = 69,163$ .....                                                                                                    | 11 |
| Figure S10. Random effects for subjective attribution (heatwaves) on policy support .....                                                                                                             | 12 |
| Figure S11. Random effects for subjective attribution (droughts) on policy support .....                                                                                                              | 13 |
| Figure S12. Random effects for subjective attribution (river floods) on policy support .....                                                                                                          | 14 |
| Figure S13. Random effects for subjective attribution (wildfires) on policy support .....                                                                                                             | 15 |
| Figure S14. Random effects for subjective attribution (tropical cyclones) on policy support .....                                                                                                     | 16 |
| Figure S15. Random effects for subjective attribution (heavy precipitation) on policy support .....                                                                                                   | 17 |
| Figure S16. Random effects for subjective attribution (European winterstorms) on policy support .....                                                                                                 | 18 |
| Figure S17. Comparison of three models as robustness check. ....                                                                                                                                      | 19 |
| Figure S18. Significant interactions between exposed population to wildfires and floods with income and residence area on climate policy support. ....                                                | 21 |
| Table S1. Weighted linear multilevel regression predicting policy support for droughts (random intercepts across countries) .....                                                                     | 22 |
| Table S2. Weighted linear multilevel regression predicting policy support for heatwaves (random intercepts across countries) .....                                                                    | 23 |
| Table S3. Weighted linear multilevel regression predicting policy support for heavy precipitation (random intercepts across countries) .....                                                          | 24 |
| Table S4. Weighted linear multilevel regression predicting policy support for river floods (random intercepts across countries) .....                                                                 | 25 |
| Table S5. Weighted linear multilevel regression predicting policy support for wildfires (random intercepts across countries) .....                                                                    | 26 |
| Table S6. Weighted linear multilevel regression predicting policy support for tropical cyclones (random intercepts across countries) .....                                                            | 27 |

|                                                                                                                                                          |    |
|----------------------------------------------------------------------------------------------------------------------------------------------------------|----|
| Table S7. Weighted linear multilevel regression predicting policy support for European winter storms (random intercepts across countries).....           | 28 |
| Table S8. Weighted linear multilevel regression predicting mean level of subjective attribution across events (random intercepts across countries) ..... | 29 |
| Table S9. Mean and standard deviation for extreme weather event variables.....                                                                           | 30 |
| Table S10. Reliability (omega) of subjective attribution scale across 67 countries in ascending order .....                                              | 31 |
| Table S11. Reliability (omega) of aggregate policy support scale across 66 countries in ascending order.....                                             | 32 |
| Table S12. Polychoric exploratory factor analysis (EFA) with items measuring climate policy support ..                                                   | 33 |
| Table S13. Definitions of extreme weather events and data sources. ....                                                                                  | 34 |
| Reference .....                                                                                                                                          | 36 |

Figure S1. Mean and standard errors of climate policy support (mean index),  $N = 67,626$

### Means and standard errors of climate policy support across countries

Error bars show standard errors, vertical line indicates global mean

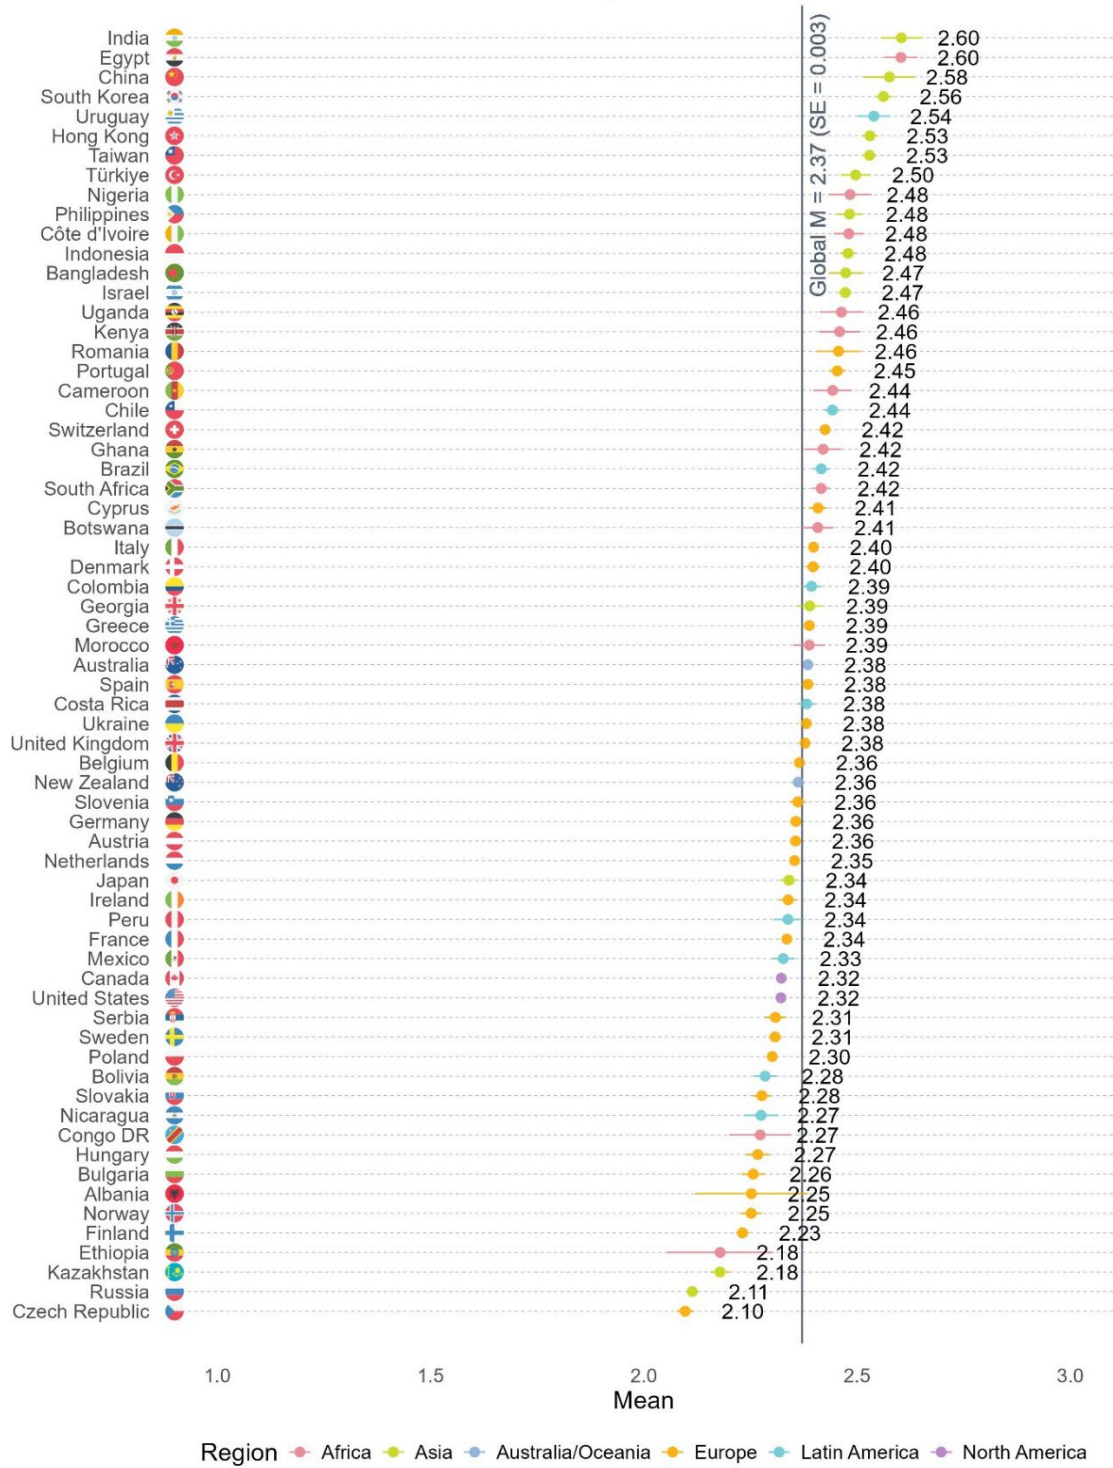

Note: Circular flags are plotted using the 'ggflags' package (Auguie et al., 2024) and are taken from EmojiOne (CC-BY-4.0/MIT): <https://github.com/13rac1/emojione-color-font/blob/master/LICENSE.md>

Figure S2. Mean and standard errors of support for taxes on carbon intense foods,  $N = 64,038$

### Means and standard errors of support for food tax across countries

Error bars show standard errors, vertical line indicates global mean

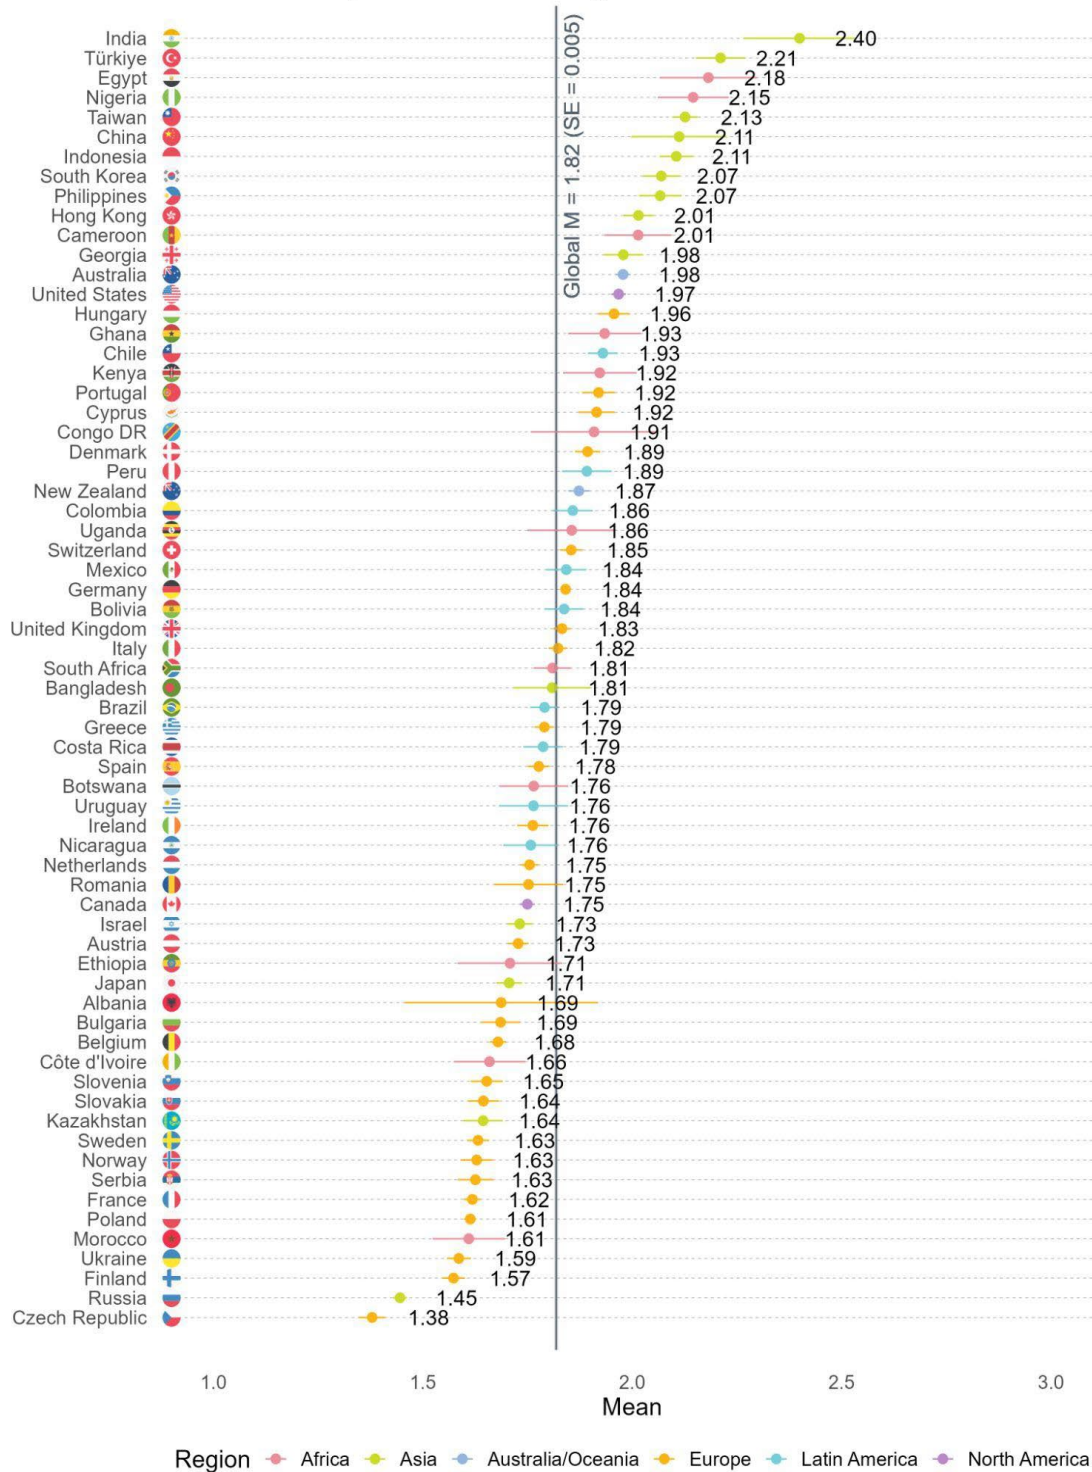

Note: Circular flags are plotted using the 'ggflags' package (Auguie et al., 2024) and are taken from EmojiOne (CC-BY-4.0/MIT): <https://github.com/13rac1/emojione-color-font/blob/master/LICENSE.md>

Figure S3. Mean and standard errors of support for fuel taxes,  $N = 64,203$

**Means and standard errors of support for fuel tax across countries**

Error bars show standard errors, vertical line indicates global mean

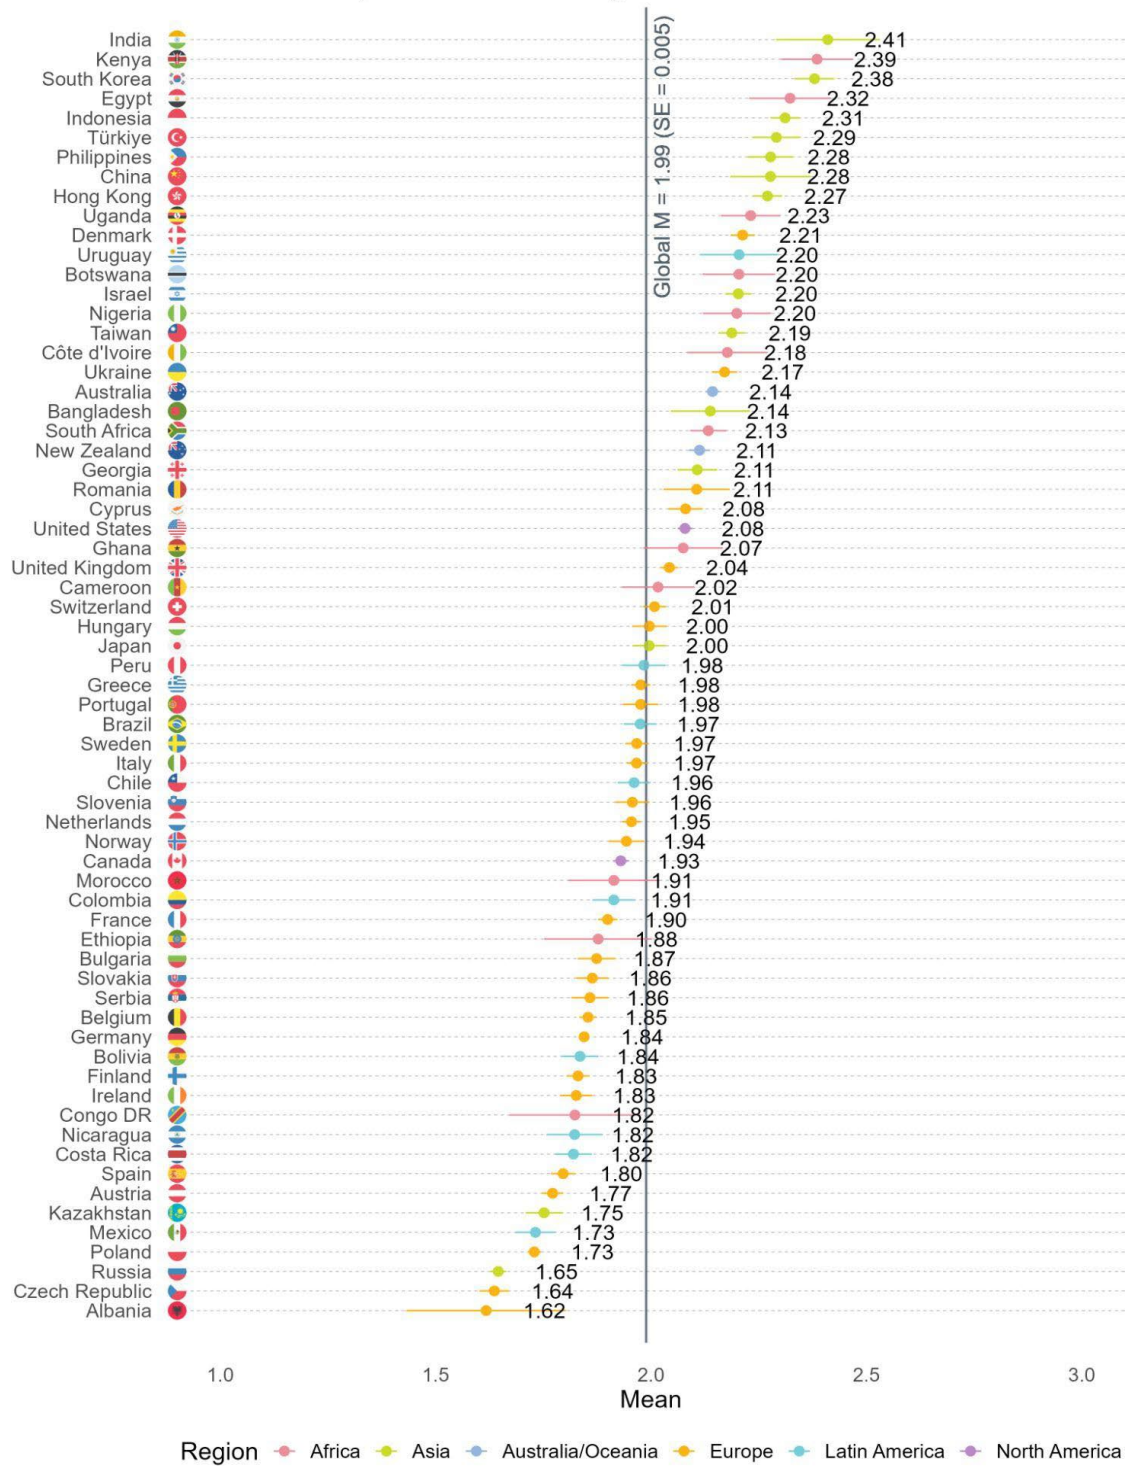

Note: Circular flags are plotted using the 'ggflags' package (Auguie et al., 2024) and are taken from EmojiOne (CC-BY-4.0/MIT): <https://github.com/13rac1/emojione-color-font/blob/master/LICENSE.md>

Figure S4. Mean and standard errors of support for public transport,  $N = 64,732$

**Means and standard errors of support for public transport across countries**

Error bars show standard errors, vertical line indicates global mean

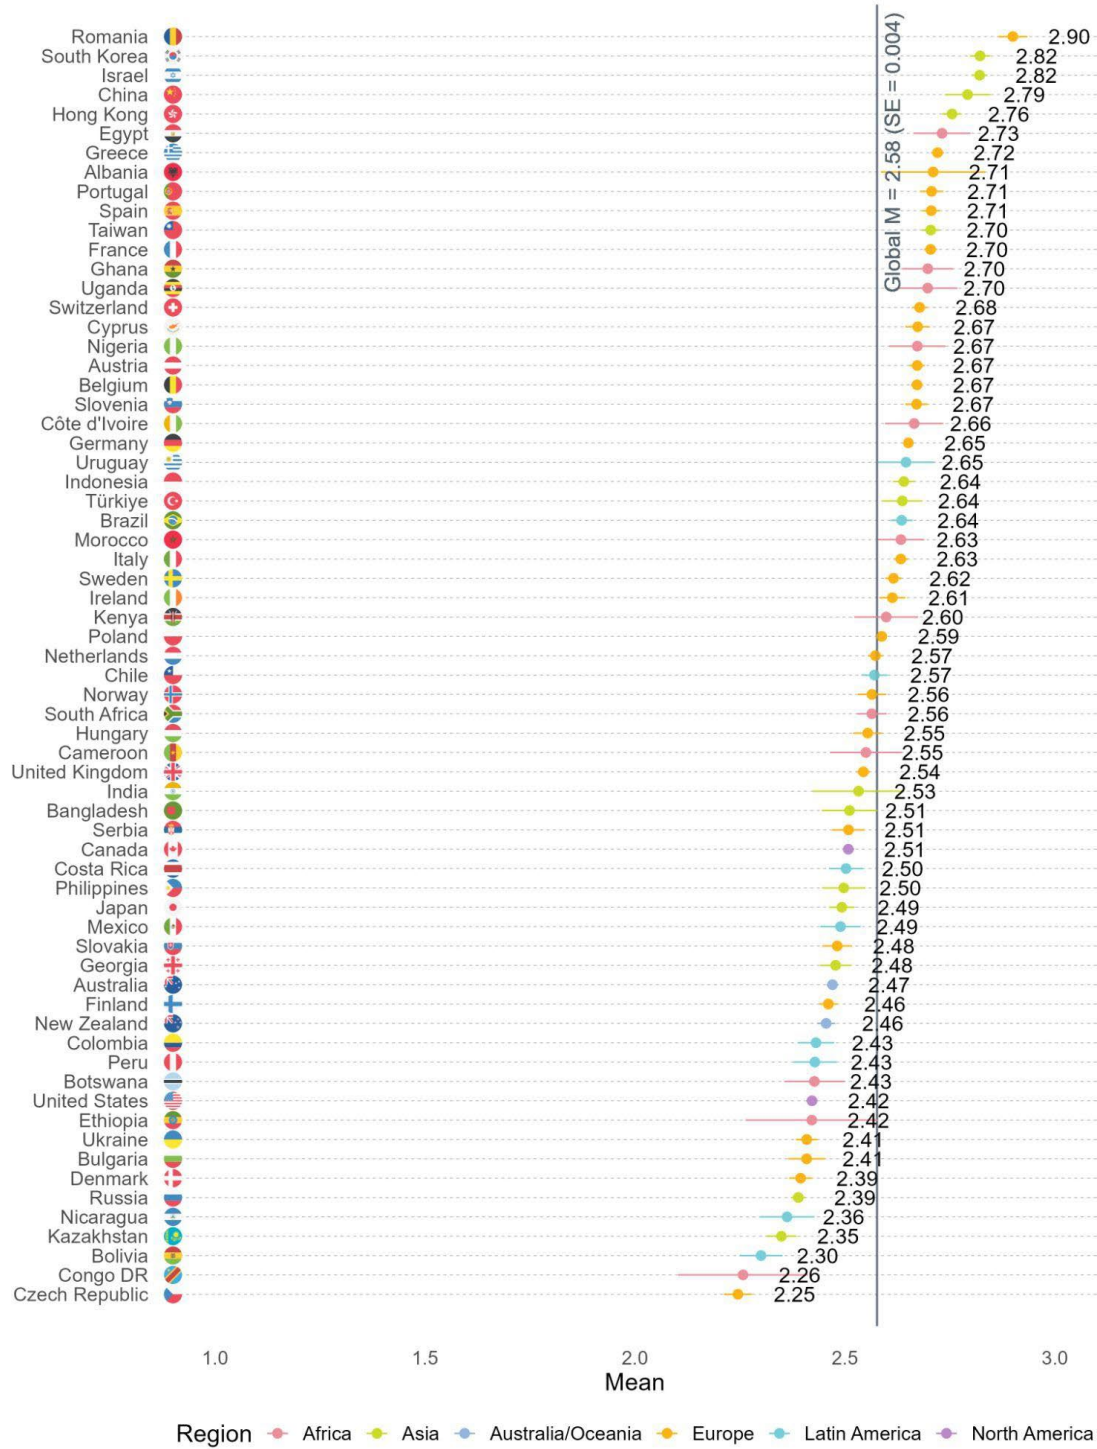

Note: Circular flags are plotted using the ‘ggflags’ package (Auguie et al., 2024) and are taken from EmojiOne (CC-BY-4.0/MIT): <https://github.com/13rac1/emojione-color-font/blob/master/LICENSE.md>

Figure S5. Mean and standard errors of support for sustainable energy,  $N = 64,278$

### Means and standard errors of support for sustainable energy across countries

Error bars show standard errors, vertical line indicates global mean

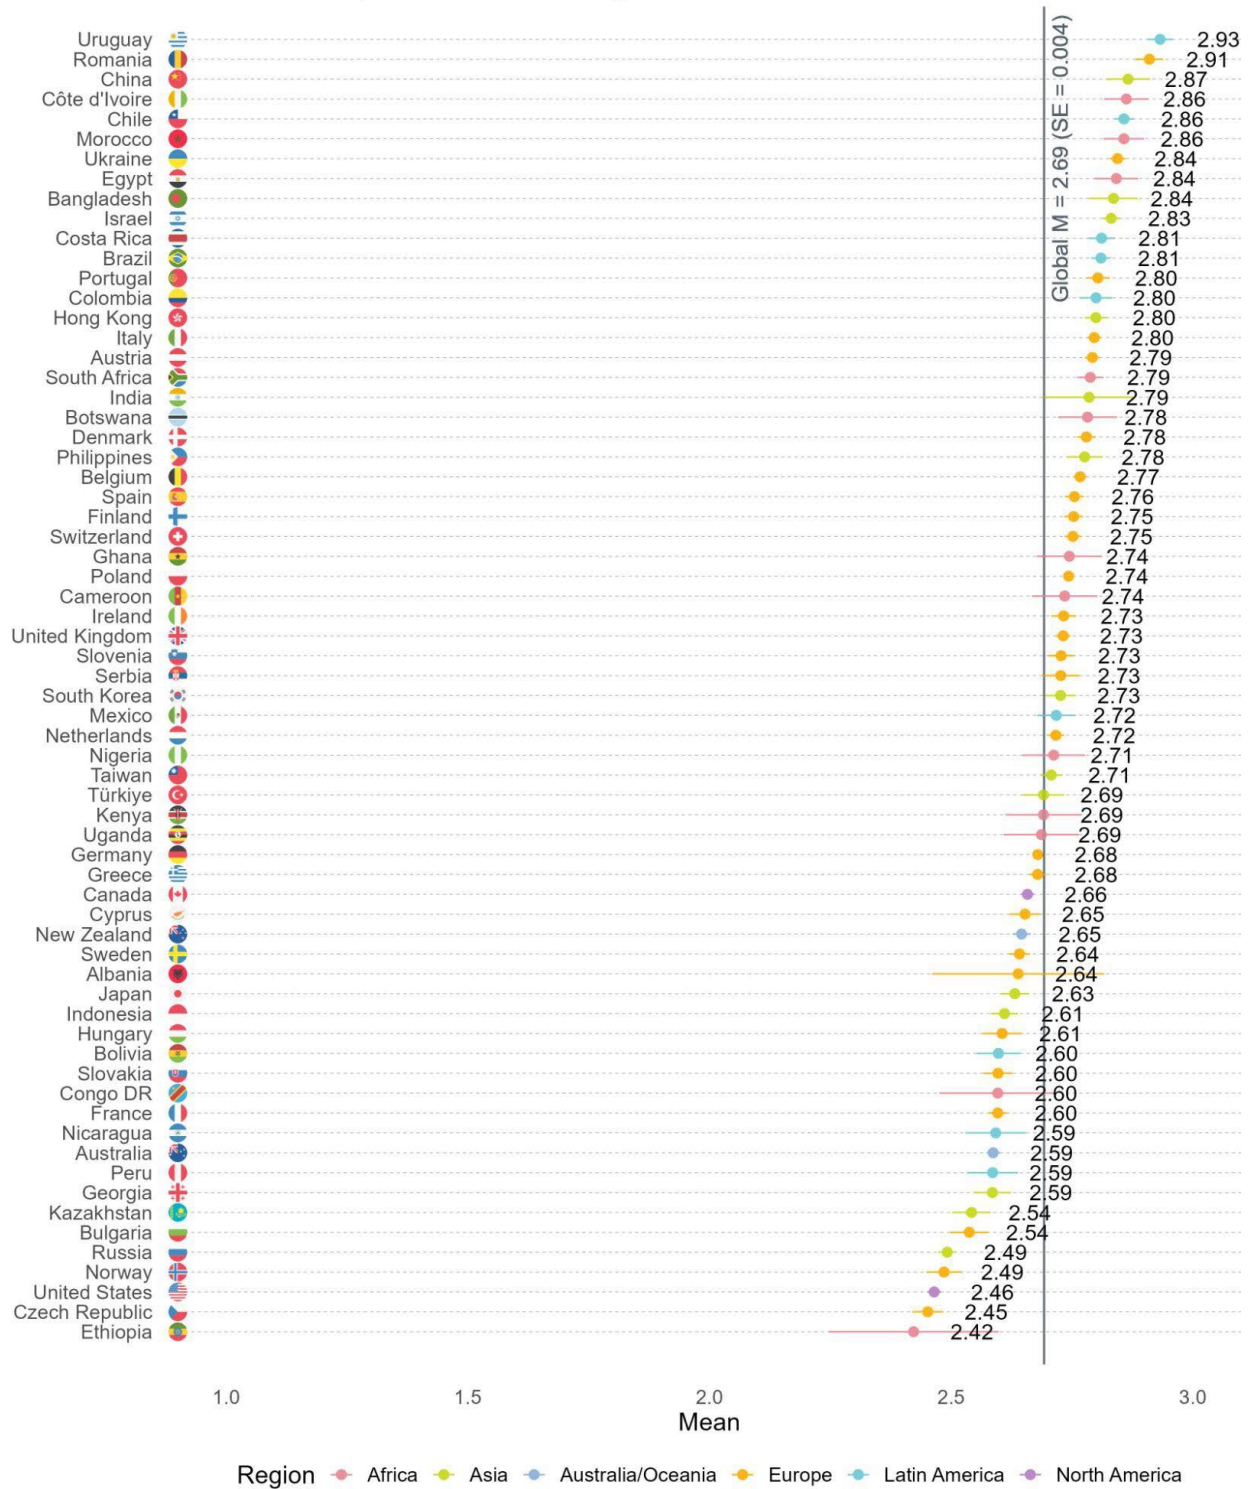

Note: Circular flags are plotted using the 'ggflags' package (Auguie et al., 2024) and are taken from EmojiOne (CC-BY-4.0/MIT): <https://github.com/13rac1/emojione-color-font/blob/master/LICENSE.md>

Figure S6. Mean and standard errors of support for protecting forested and land areas,  $N = 63,566$

**Means and standard errors of support for protecting forest and land areas across countries**

Error bars show standard errors, vertical line indicates global mean

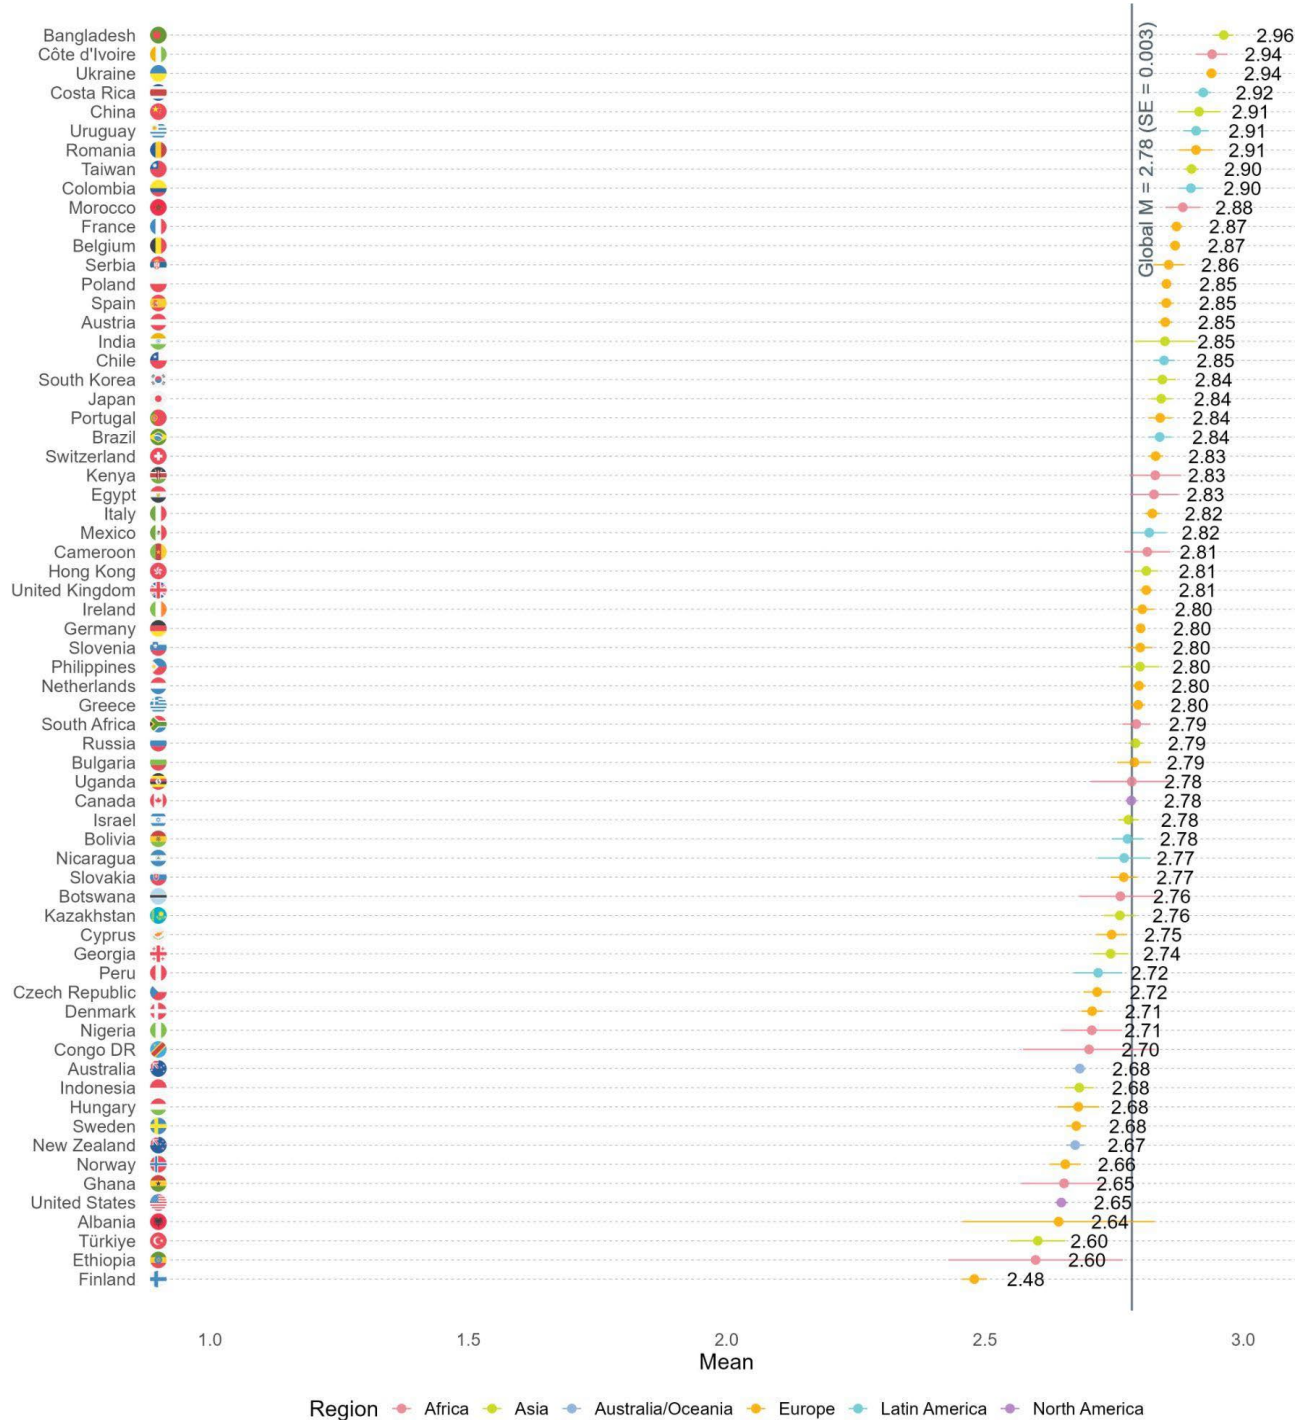

Note: Circular flags are plotted using the 'ggflags' package (Auguie et al., 2024) and are taken from EmojiOne (CC-BY-4.0/MIT): <https://github.com/13rac1/emojione-color-font/blob/master/LICENSE.md>

Figure S7. Weighted linear multilevel models comparing effects across policy measures (aggregate, taxes, green transition) for each extreme weather event (random intercepts across countries).

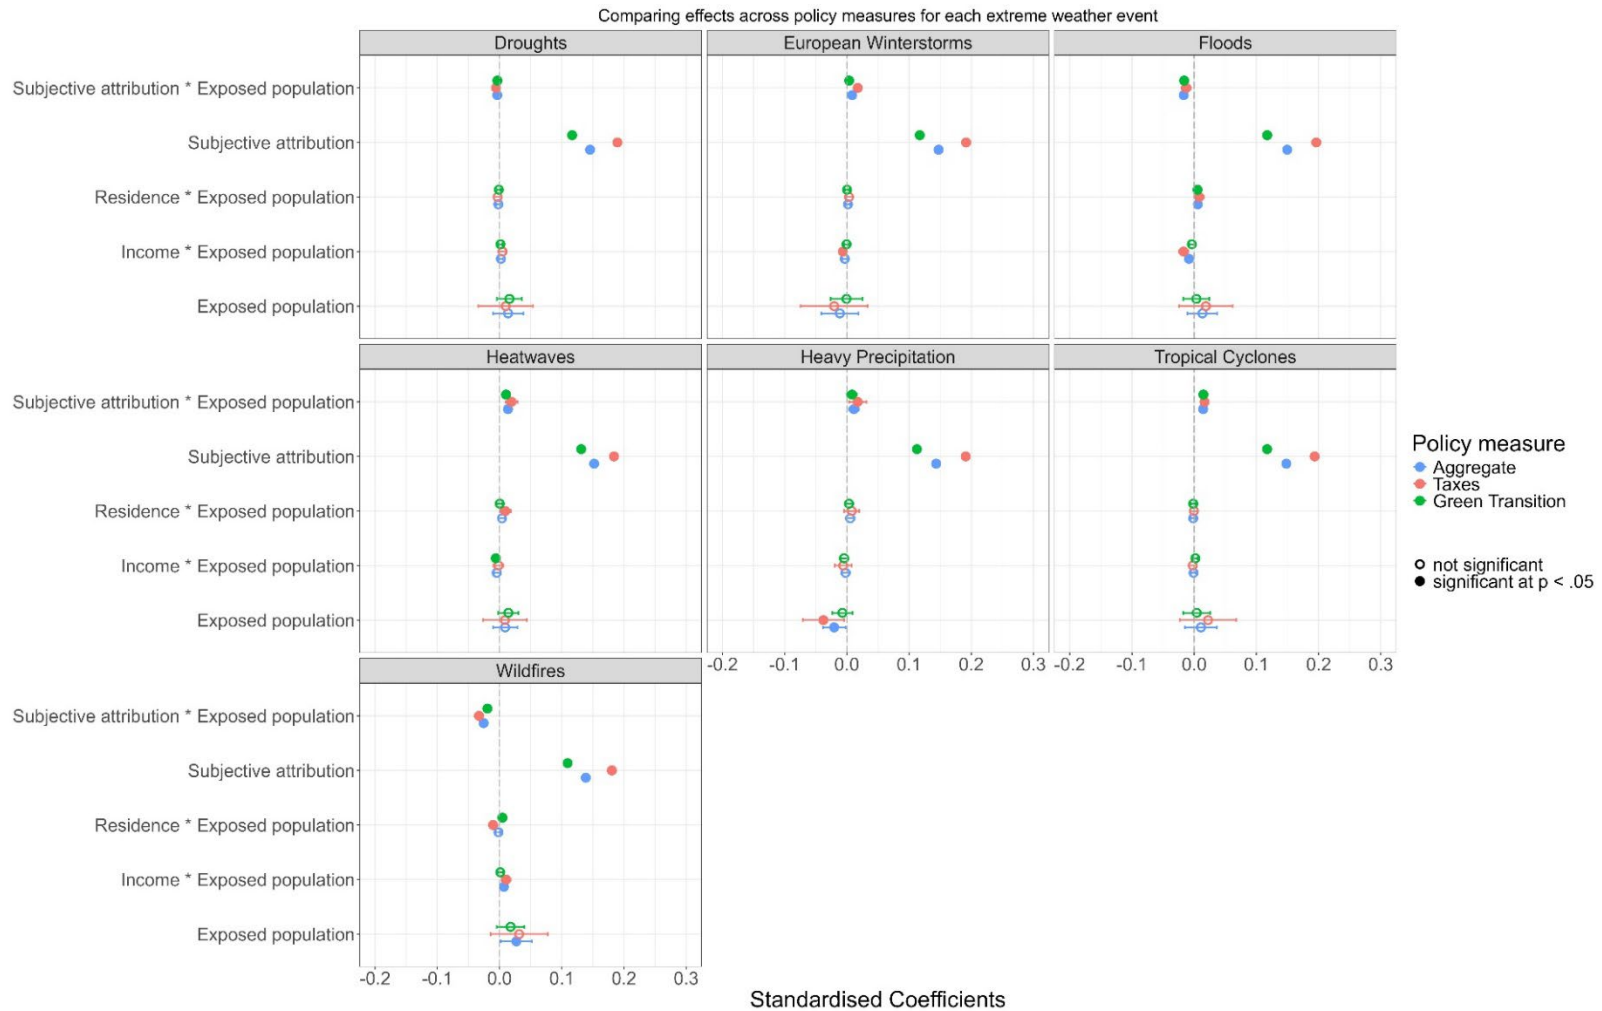

Note: These models include socio-demographic variables. Error bars denote 95% confidence intervals. Circles denote standardized estimates. Filled circles denote significant effects at  $p < .05$ .

Figure S8. Effect of male gender on climate policy support across countries.

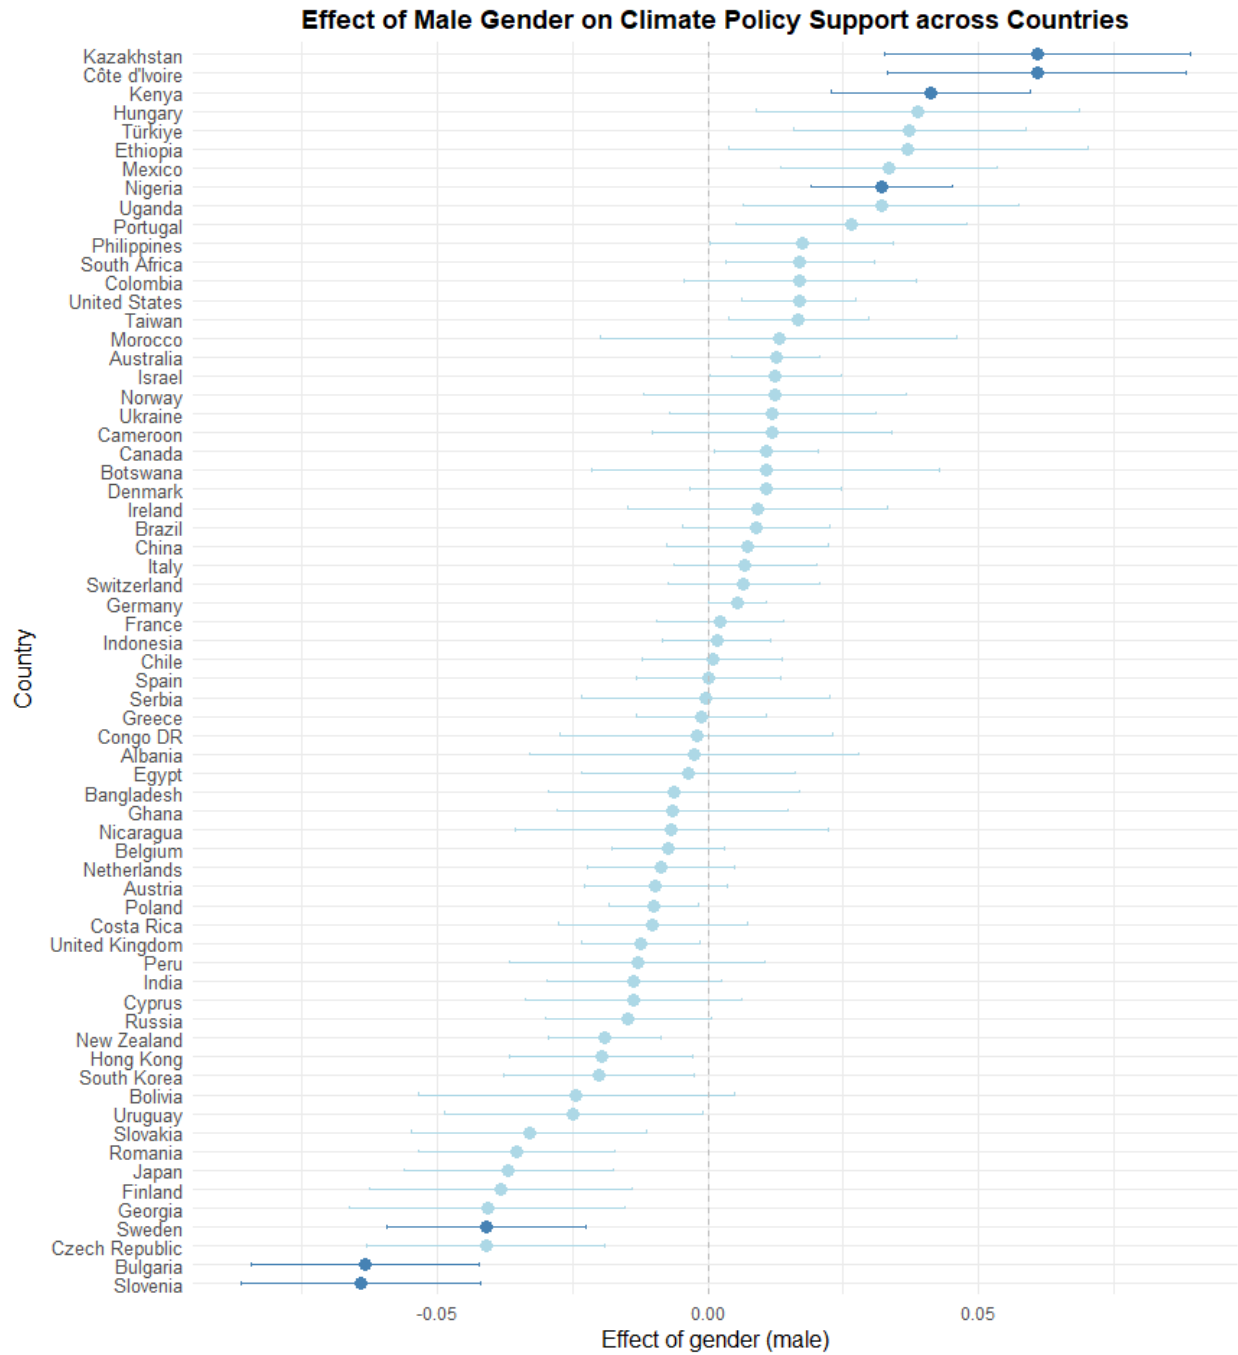

*Note:* The effects of gender on policy support were calculated with individual linear regressions for each country, with socio-demographic variables as independent variables. These models include data from 66 countries (excluding Malaysia and Argentina where policy support was not assessed). Significant effects at  $p > .05$  are shown in dark blue. The number of participants in each country can be found in Mede et al. (2025).

Figure S9. Mean and standard errors of subjective attribution across countries,  $N = 69,163$

**Means and standard errors of subjective attribution across countries**

Error bars show standard errors, vertical line indicates global mean

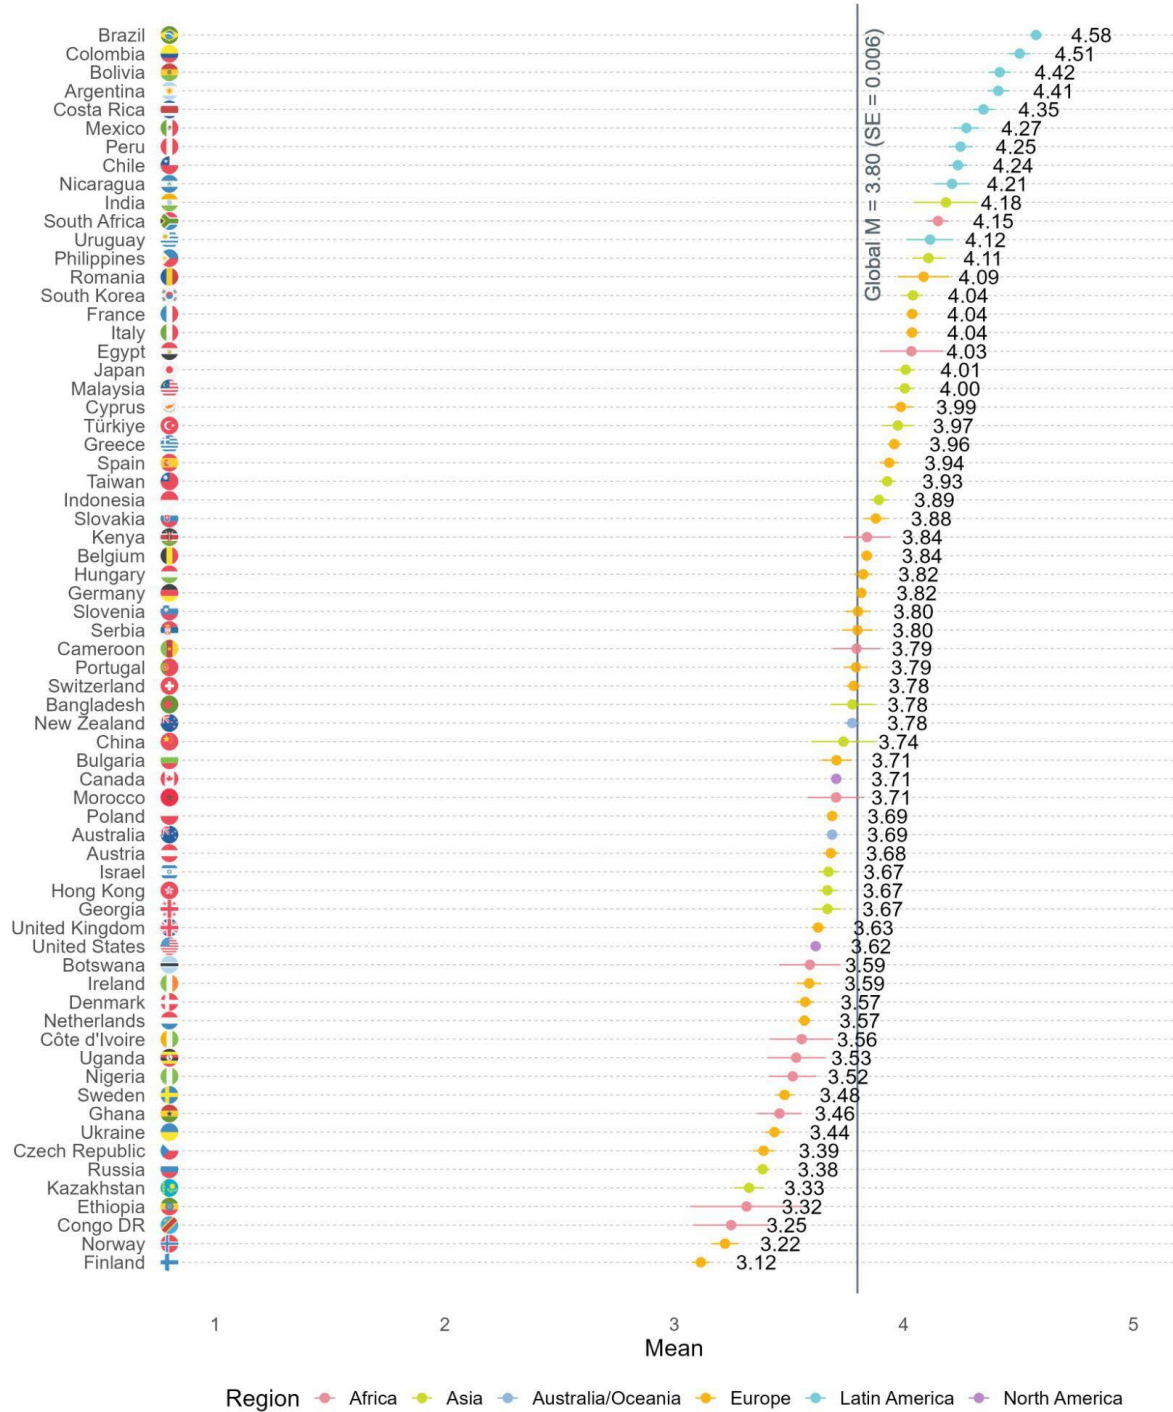

Note: Circular flags are plotted using the ‘ggflags’ package (Auguie et al., 2024) and are taken from EmojiOne (CC-BY-4.0/MIT): <https://github.com/13rac1/emojione-color-font/blob/master/LICENSE.md>

Figure S10. Random effects for subjective attribution (heatwaves) on policy support

Random effects of subjective attribution of heatwaves on policy support across countries

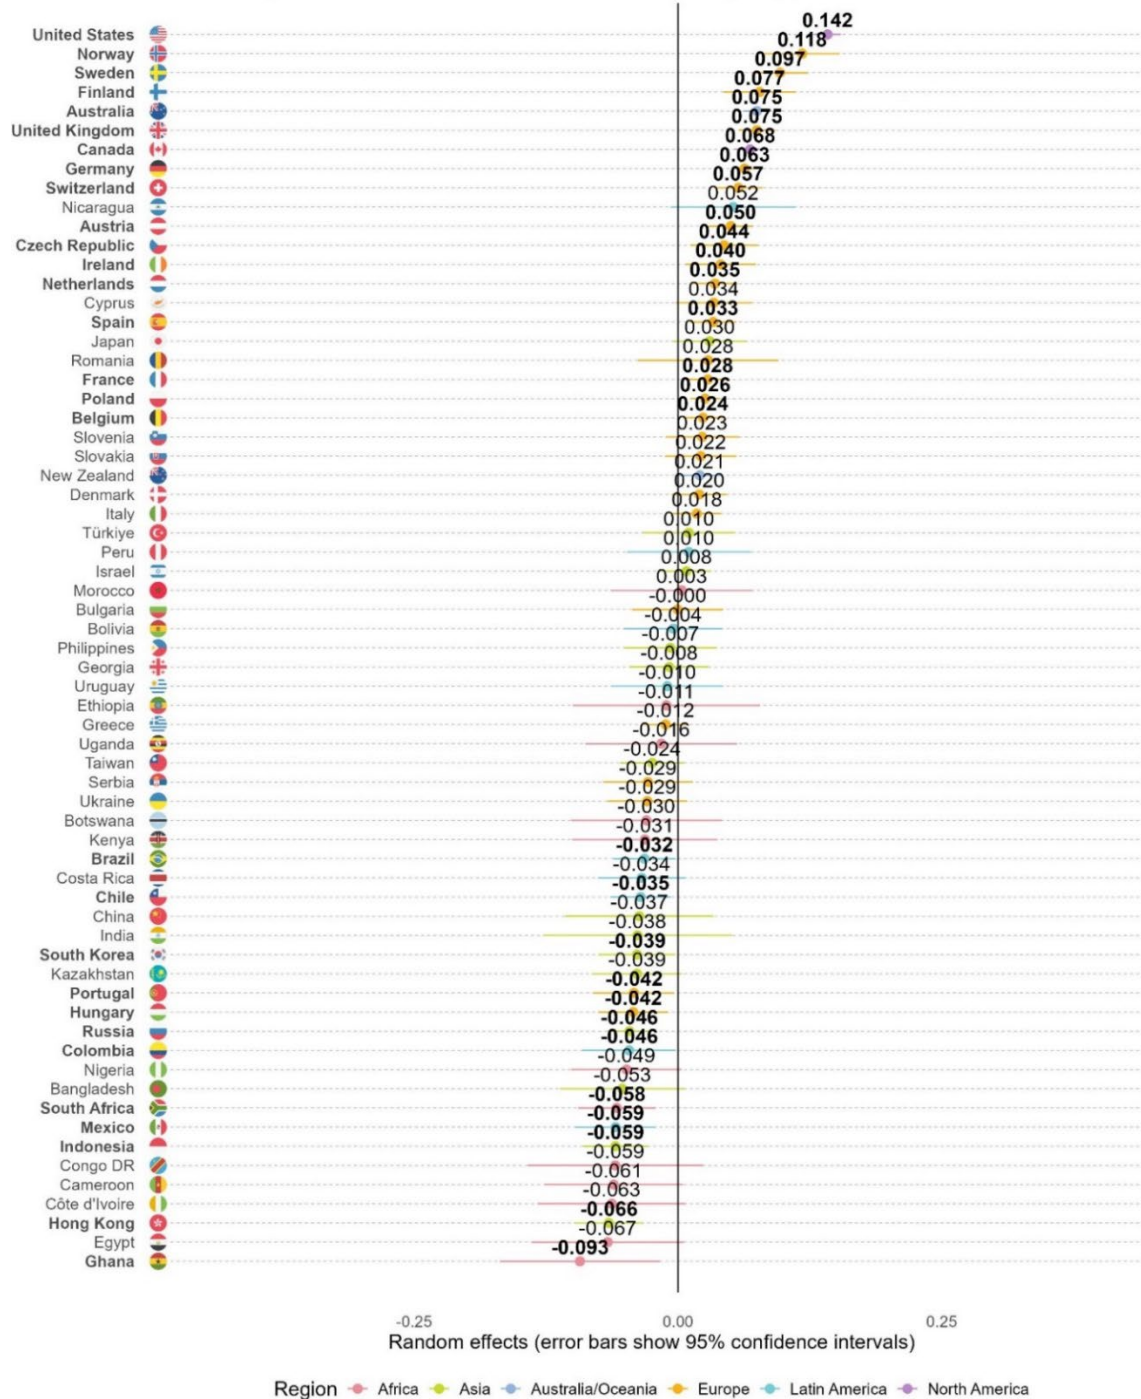

Note: Dots indicate point estimates of random effects, horizontal lines indicate 95% confidence intervals based on two-sided t tests. Effects significant at  $p < .05$  are printed in bold. Total  $N = 46,964$ . Circular flags are plotted using the 'ggflags' package (Auguie et al., 2024) and are taken from EmojiOne (CC-BY-4.0/MIT): <https://github.com/13rac1/emoji-one-color-font/blob/master/LICENSE.md>

Figure S11. Random effects for subjective attribution (droughts) on policy support

Random effects of subjective attribution of droughts on policy support across countries

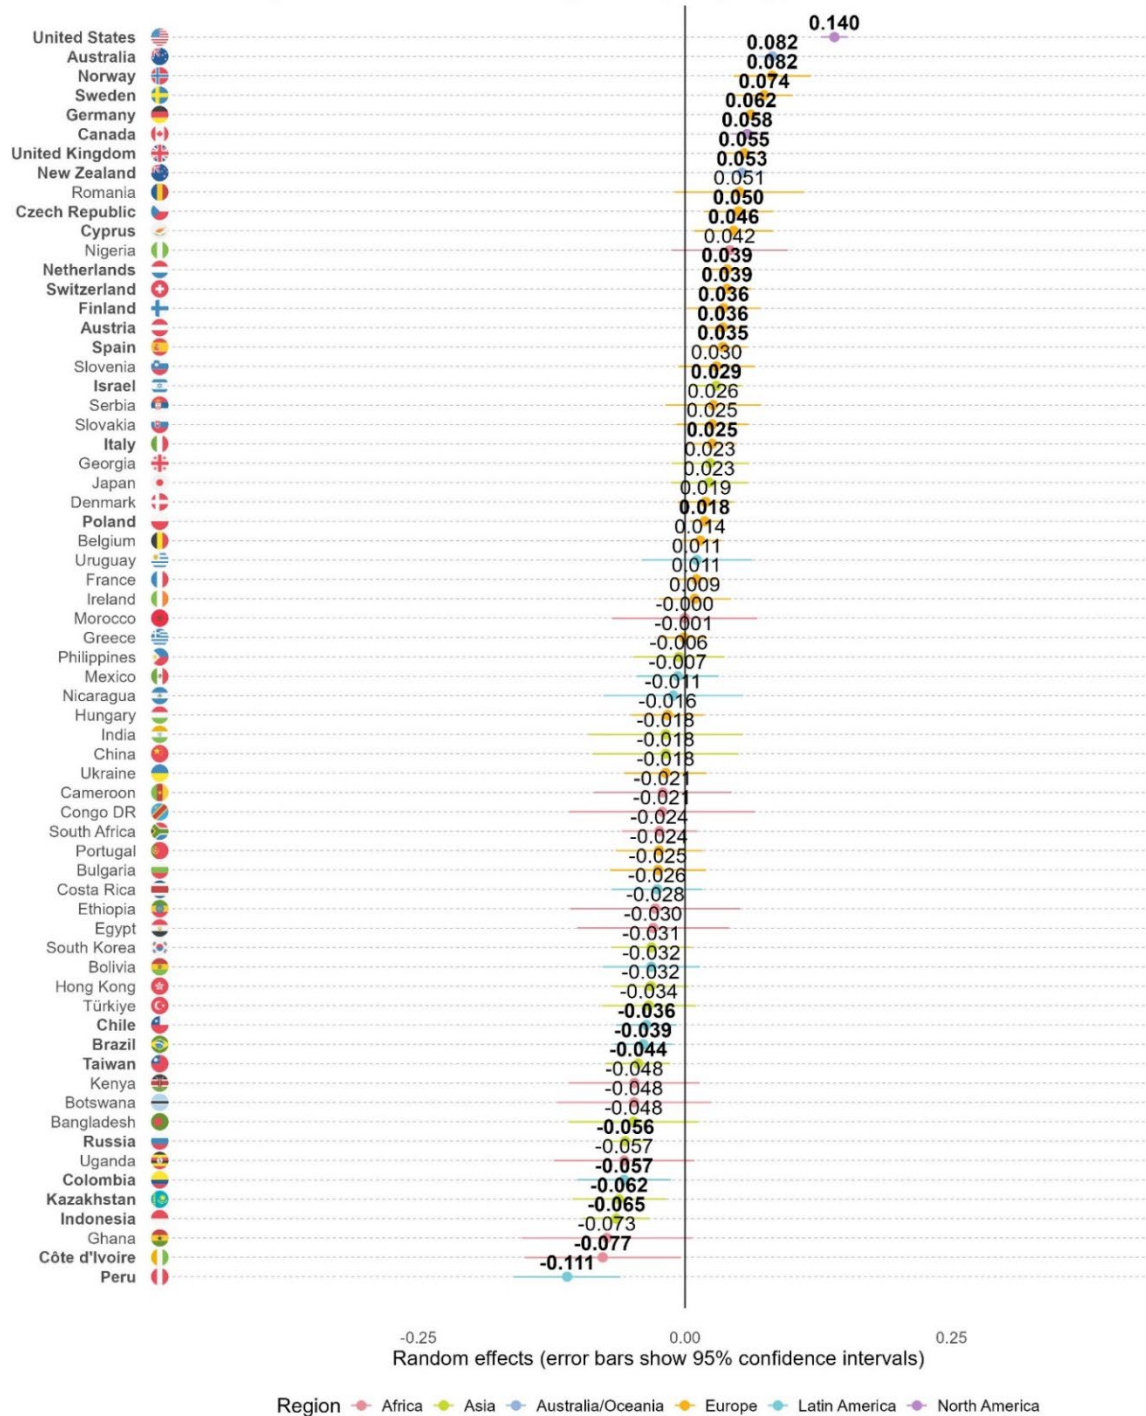

Note: Dots indicate point estimates of random effects, horizontal lines indicate 95% confidence intervals based on two-sided t tests. Effects significant at  $p < .05$  are printed in bold. Total  $N = 46,947$ . Circular flags are plotted using the 'ggflags' package (Auguie et al., 2024) and are taken from EmojiOne (CC-BY-4.0/MIT): <https://github.com/13rac1/emoji-one-color-font/blob/master/LICENSE.md>

Figure S12. Random effects for subjective attribution (river floods) on policy support

Random effects of subjective attribution of floods on policy support across countries

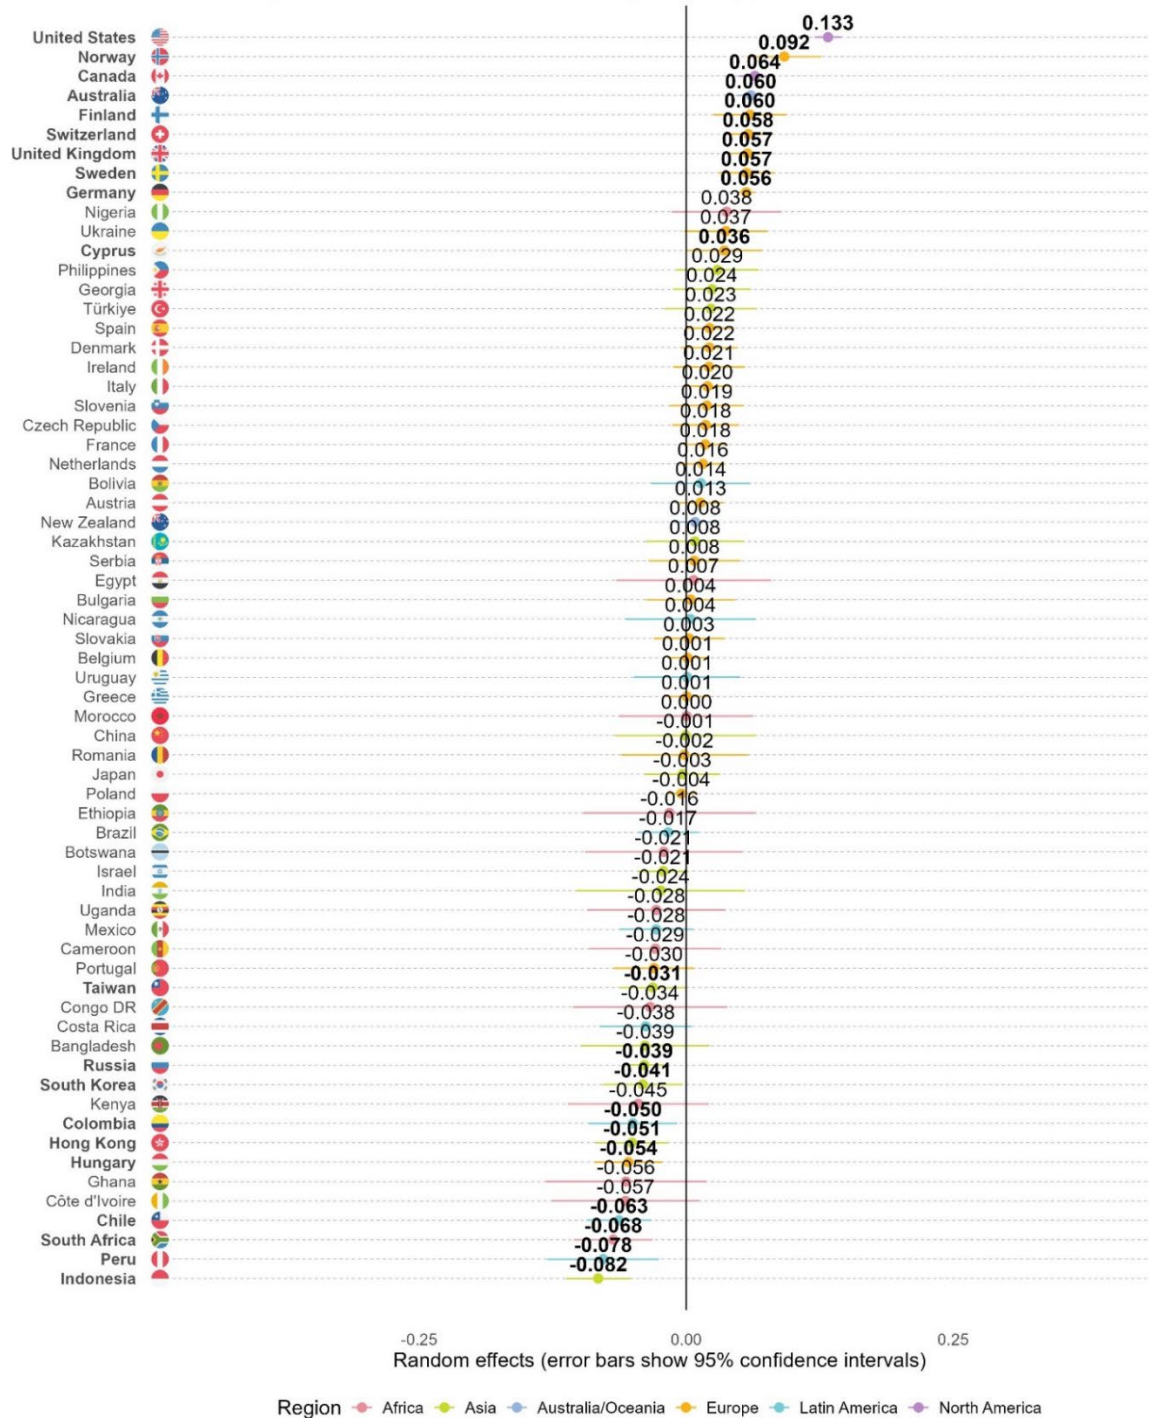

Note: Dots indicate point estimates of random effects, horizontal lines indicate 95% confidence intervals based on two-sided t tests. Effects significant at  $p < .05$  are printed in bold. Total  $N = 46,964$ . Circular flags are plotted using the 'ggflags' package (Auguie et al., 2024) and are taken from EmojiOne (CC-BY-4.0/MIT): <https://github.com/13rac1/emoji-one-color-font/blob/master/LICENSE.md>

Figure S13. Random effects for subjective attribution (wildfires) on policy support

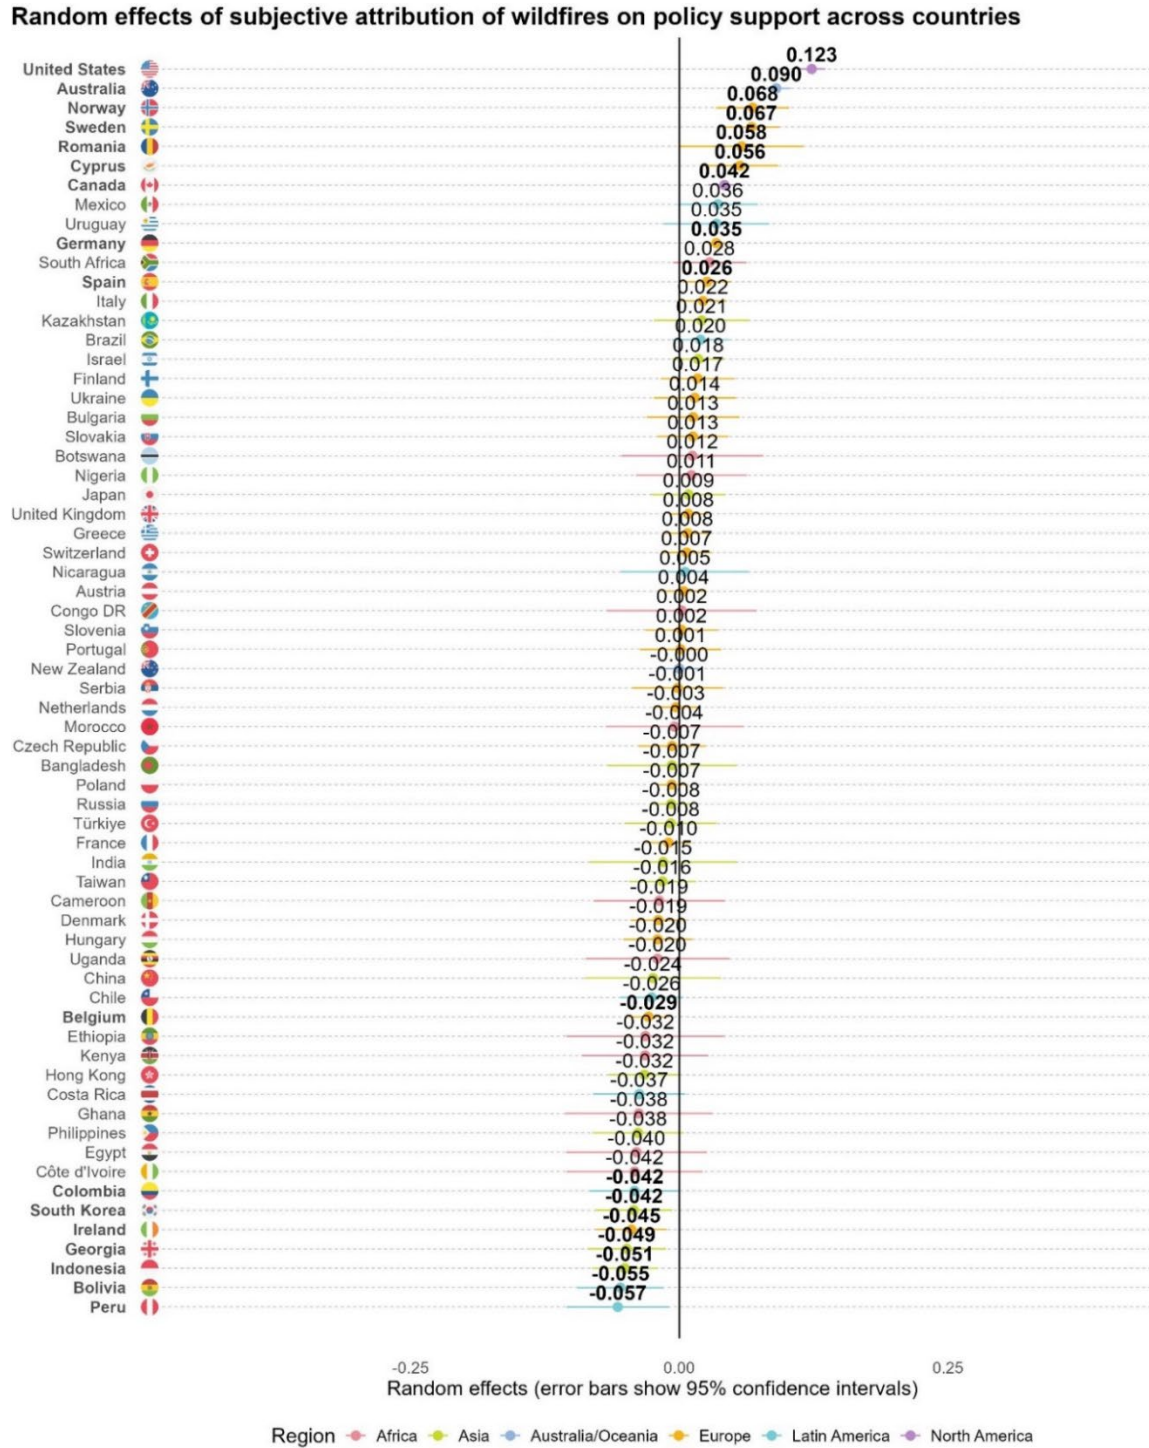

*Note:* Dots indicate point estimates of random effects, horizontal lines indicate 95% confidence intervals based on two-sided t tests. Effects significant at  $p < .05$  are printed in bold. Total  $N = 46,954$ . Circular flags are plotted using the 'ggflags' package (Auguie et al., 2024) and are taken from EmojiOne (CC-BY-4.0/MIT): <https://github.com/13rac1/emojione-color-font/blob/master/LICENSE.md>

Figure S14. Random effects for subjective attribution (tropical cyclones) on policy support

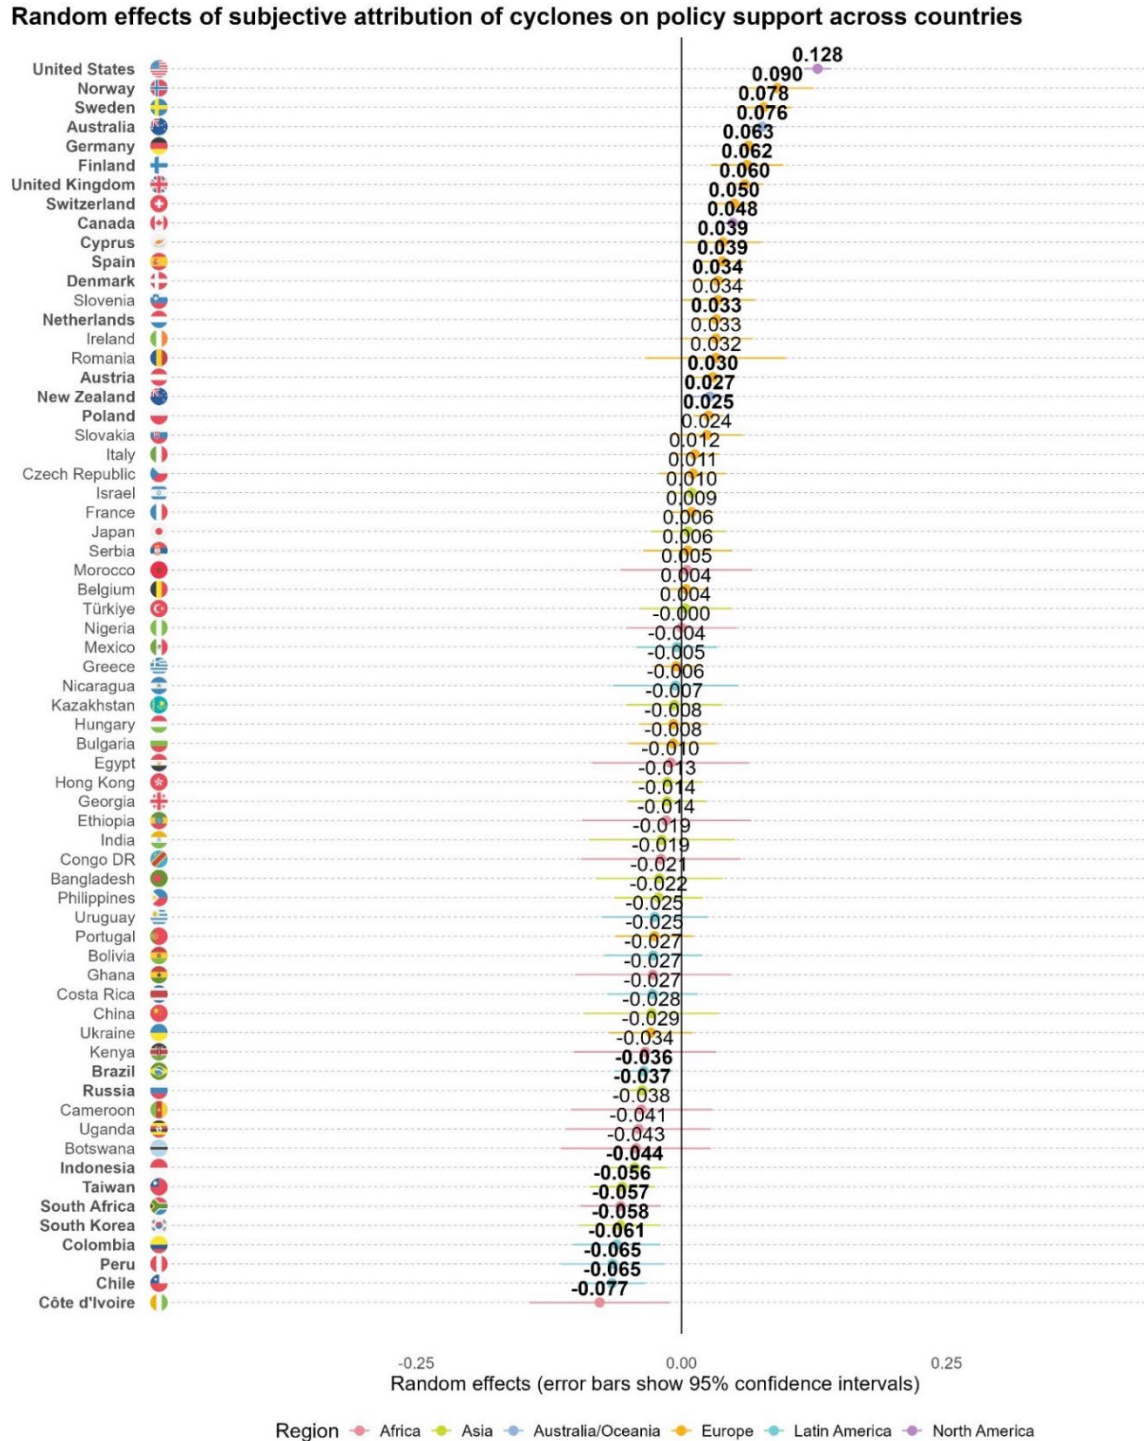

*Note:* Dots indicate point estimates of random effects, horizontal lines indicate 95% confidence intervals based on two-sided t tests. Effects significant at  $p < .05$  are printed in bold. Total  $N = 46,961$ . Circular flags are plotted using the ‘ggflags’ package (Aguie et al., 2024) and are taken from EmojiOne (CC-BY-4.0/MIT): <https://github.com/13rac1/emoji-one-color-font/blob/master/LICENSE.md>

Figure S15. Random effects for subjective attribution (heavy precipitation) on policy support

Random effects of subjective attribution of heavy precipitation on policy support across countries

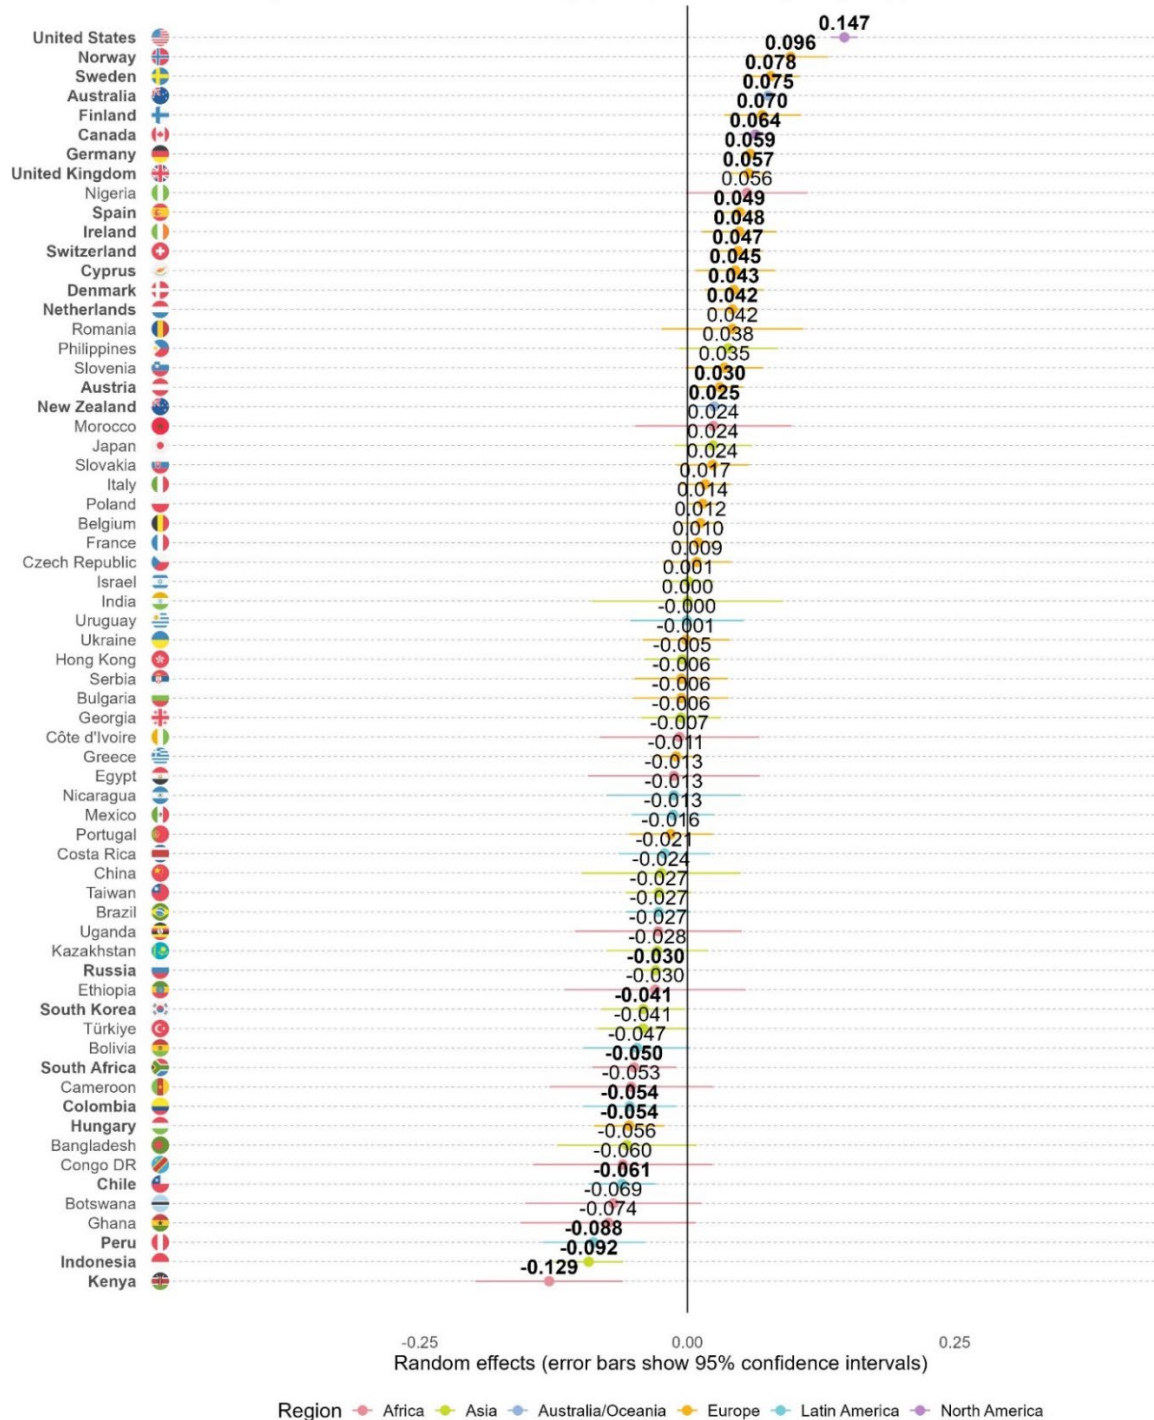

Note: Dots indicate point estimates of random effects, horizontal lines indicate 95% confidence intervals based on two-sided t tests. Effects significant at  $p < .05$  are printed in bold. Total  $N = 46,958$ . Circular flags are plotted using the ‘ggflags’ package (Auguie et al., 2024) and are taken from EmojiOne (CC-BY-4.0/MIT): <https://github.com/13rac1/emojione-color-font/blob/master/LICENSE.md>

Figure S16. Random effects for subjective attribution (European winterstorms) on policy support

Random effects of subjective attribution of winterstorms on policy support across countries

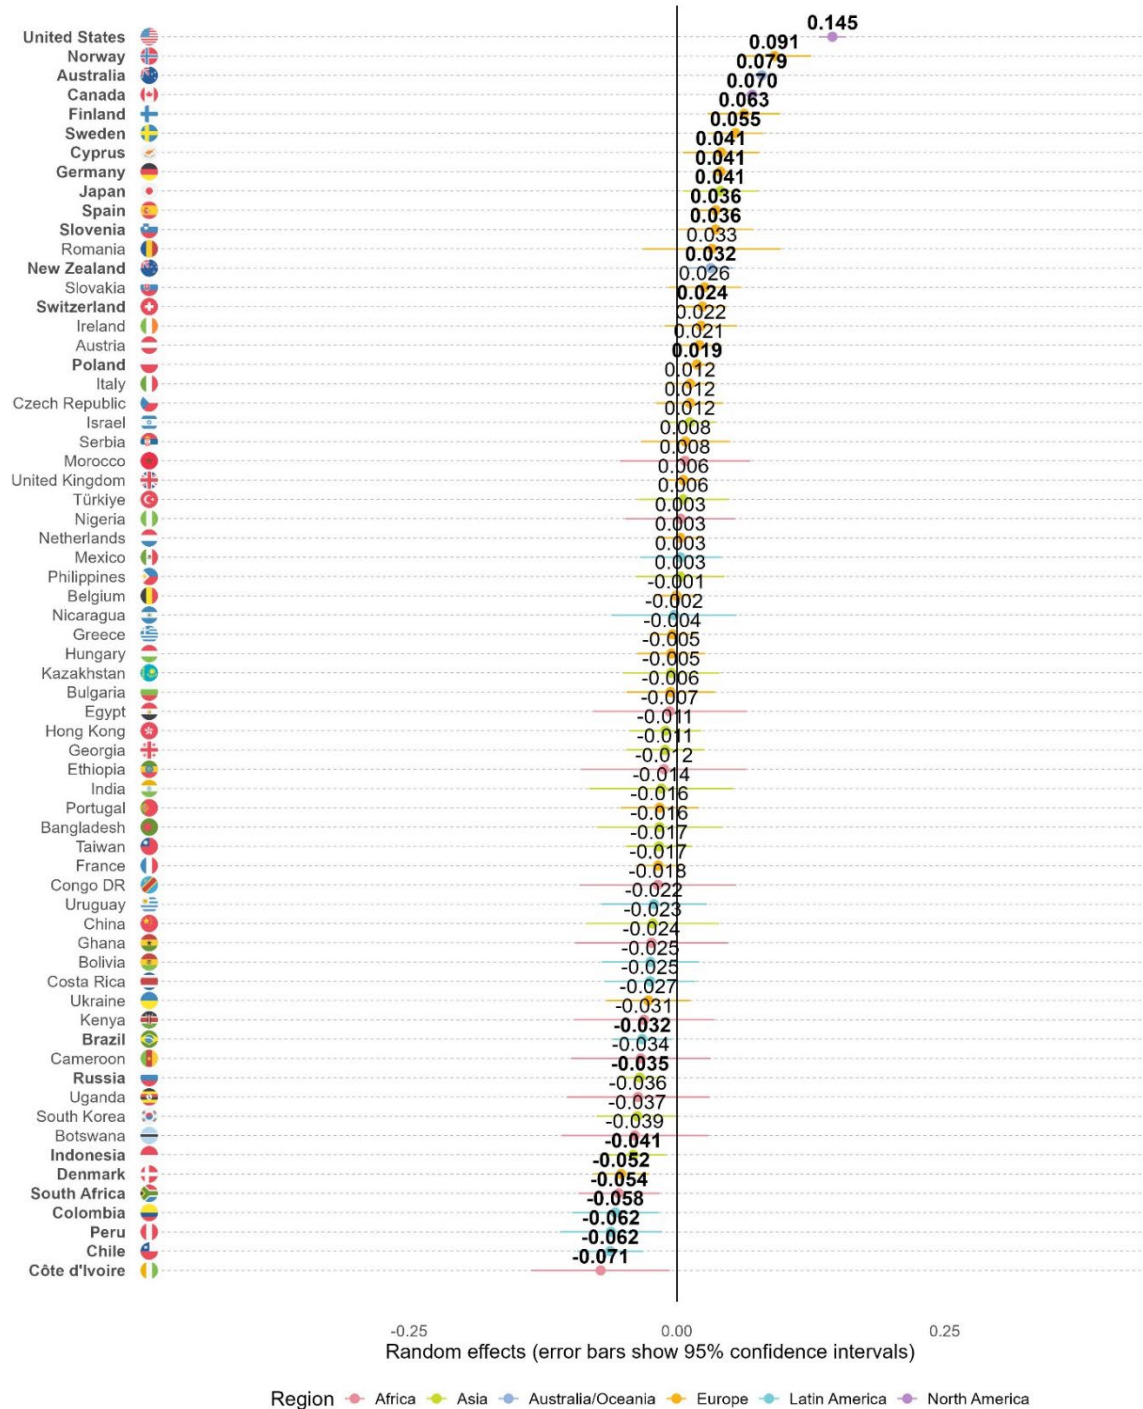

Note: Dots indicate point estimates of random effects, horizontal lines indicate 95% confidence intervals based on two-sided t tests. Effects significant at  $p < .05$  are printed in bold. Total  $N = 46,961$ . Circular flags are plotted using the 'ggflags' package (Auguie et al., 2024) and are taken from EmojiOne (CC-BY-4.0/MIT): <https://github.com/13rac1/emoji-one-color-font/blob/master/LICENSE.md>

Figure S17. Comparison of three models as robustness check.

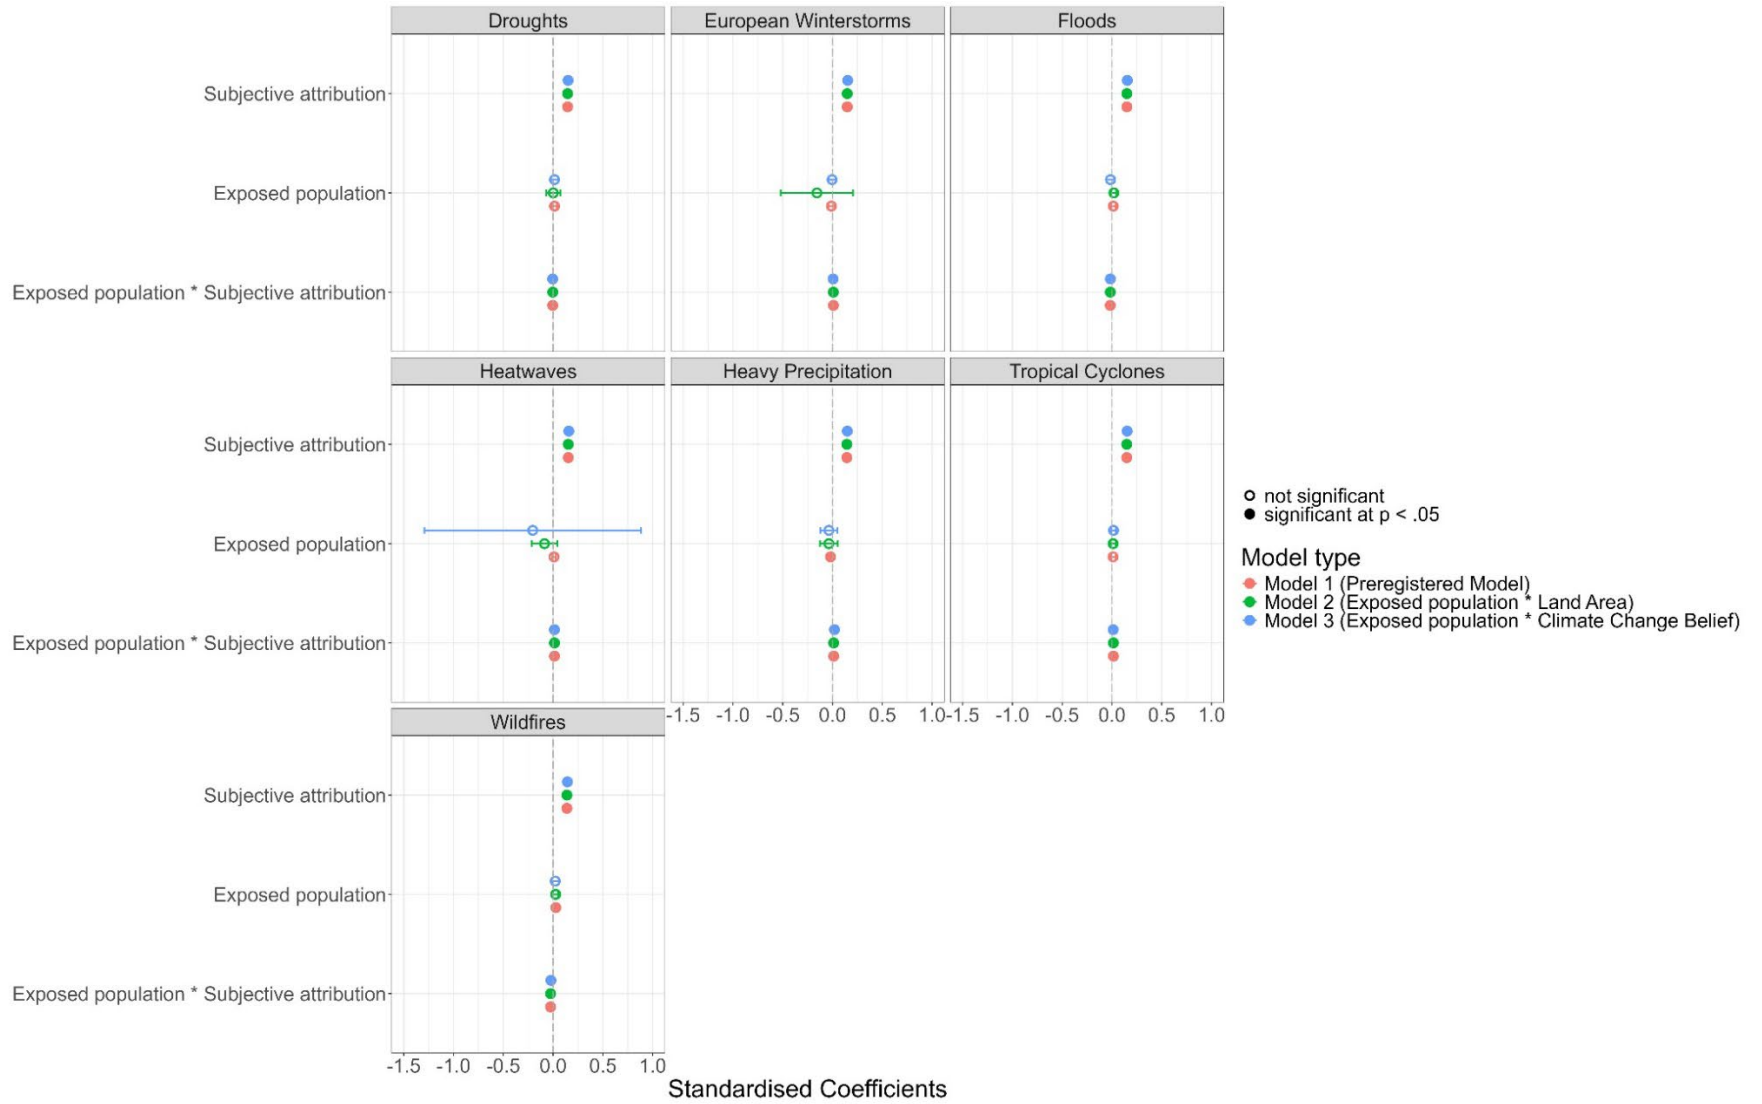

*Note:* Model 1 is the preregistered multilevel model shown in Figure 4 (data is available for 65 countries). Model 2 additionally includes an interaction effect for exposed population and land area. Model 3 additionally includes an interaction effect for exposed population and climate change belief on the country level (data was available for 48 countries). All models include random intercepts across countries and control for socio-demographic variables and two additional interaction terms (exposed population  $\times$  income and exposed population  $\times$  residence area). Error bars denote 95% confidence intervals. Circles denote standardized estimates. Filled circles denote significant effects at  $p < .05$ .

Figure S18. Significant interactions between exposed population to wildfires and floods with income and residence area on climate policy support.

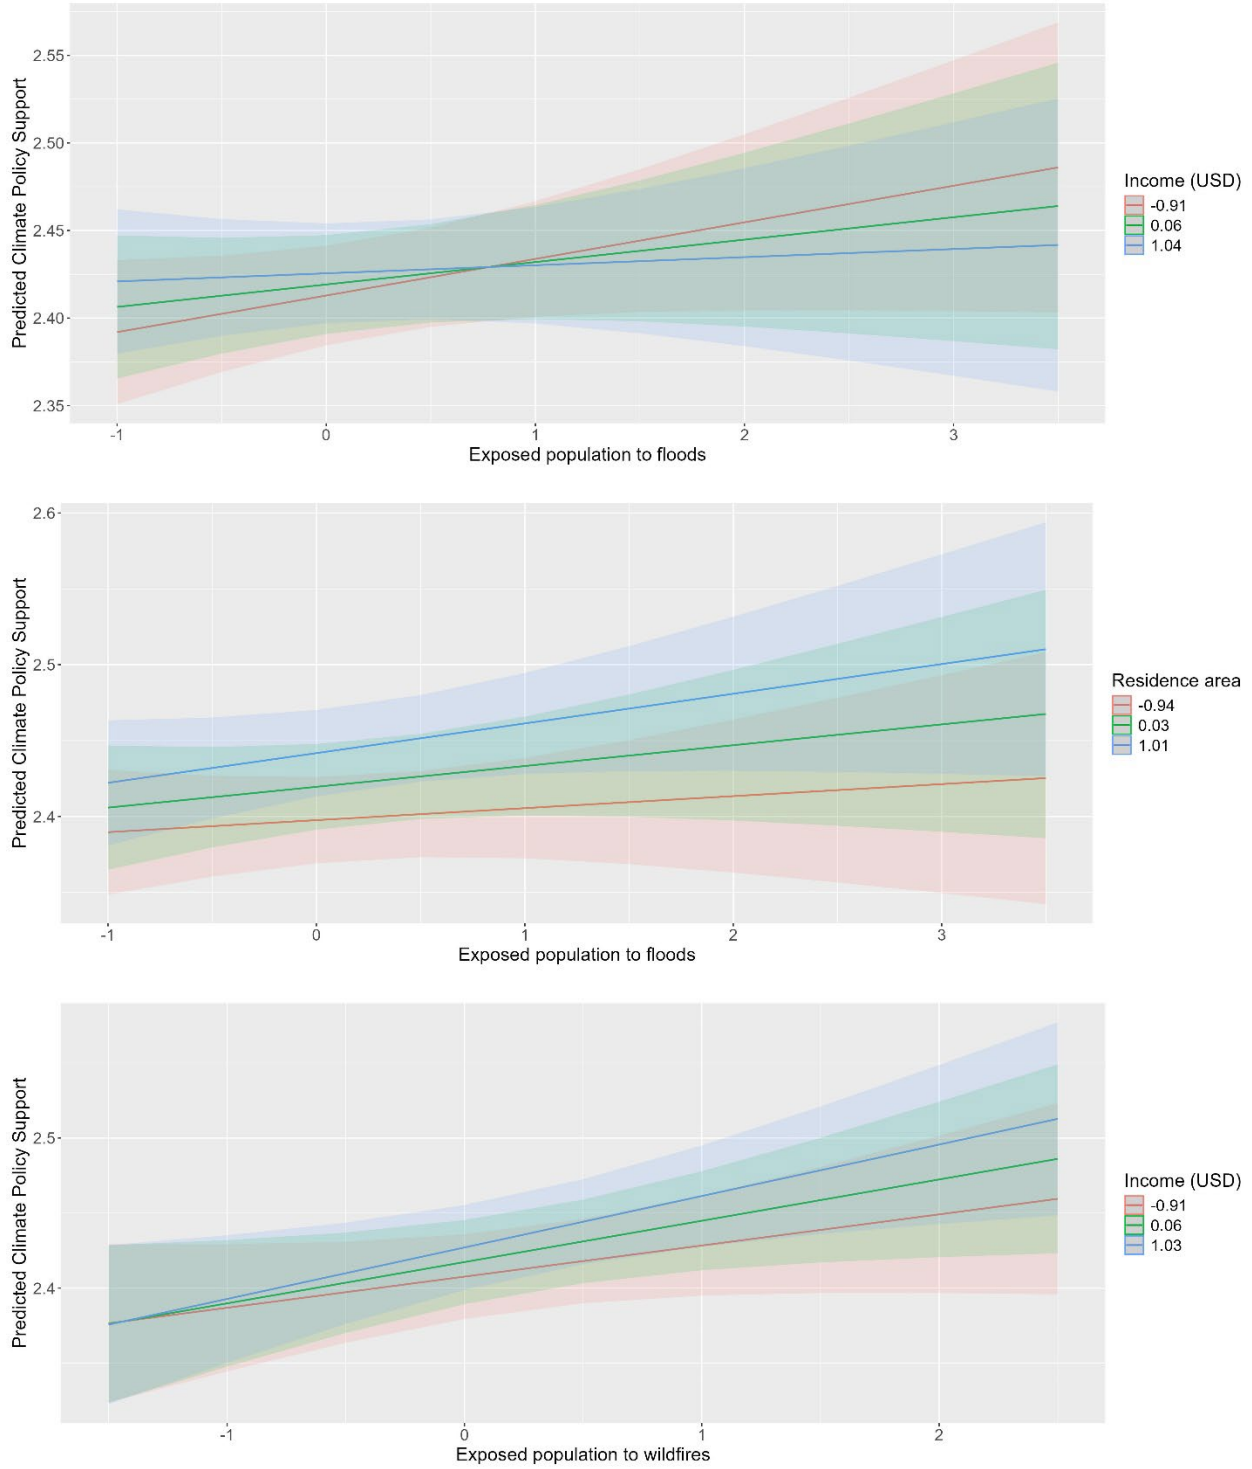

Table S1. Weighted linear multilevel regression predicting policy support for droughts (random intercepts across countries)

| <i>Predictors</i>                                       | <b>Step 1: Exposed population</b> |           |                  |           | <b>Step 2: Moderation analyses</b> |           |                  |           |
|---------------------------------------------------------|-----------------------------------|-----------|------------------|-----------|------------------------------------|-----------|------------------|-----------|
|                                                         | <i>Beta</i>                       | <i>SE</i> | <i>Statistic</i> | <i>p</i>  | <i>Beta</i>                        | <i>SE</i> | <i>Statistic</i> | <i>p</i>  |
| Intercept                                               | 2.444                             | 0.015     | 167.806          | <.001     | 2.443                              | 0.015     | 166.616          | <.001     |
| Gender (male)                                           | 0.000                             | 0.002     | -0.144           | .886      | 0.008                              | 0.002     | 4.248            | <.001     |
| Age                                                     | -0.015                            | 0.002     | -8.635           | <.001     | -0.019                             | 0.002     | -11.291          | <.001     |
| Education (tertiary)                                    | 0.038                             | 0.002     | 19.246           | <.001     | 0.032                              | 0.002     | 17.015           | <.001     |
| Income                                                  | 0.0100                            | 0.002     | 5.125            | <.001     | 0.008                              | 0.002     | 4.528            | <.001     |
| Residence place (urban)                                 | 0.027                             | 0.002     | 14.238           | <.001     | 0.024                              | 0.002     | 13.269           | <.001     |
| Political orientation (right)                           | -0.056                            | 0.002     | -24.873          | <.001     | -0.039                             | 0.002     | -18.258          | <.001     |
| Political orientation (conservative)                    | -0.042                            | 0.002     | -18.514          | <.001     | -0.032                             | 0.002     | -14.82           | <.001     |
| Religiosity                                             | 0.024                             | 0.002     | 12.011           | <.001     | 0.018                              | 0.002     | 9.769            | <.001     |
| Exposed population to droughts                          | 0.014                             | 0.012     | 1.11             | .272      | 0.014                              | 0.012     | 1.101            | .275      |
| Subjective attribution                                  |                                   |           |                  |           | 0.146                              | 0.002     | 80.37            | <.001     |
| Exposed population to droughts * Subjective attribution |                                   |           |                  |           | -0.004                             | 0.002     | -2.185           | .029      |
| Exposed population to droughts * Income                 |                                   |           |                  |           | 0.002                              | 0.002     | 1.349            | .177      |
| Exposed population to droughts * Residence (urban)      |                                   |           |                  |           | -0.002                             | 0.002     | -1.119           | .263      |
| <b>Random Effects</b>                                   |                                   |           |                  |           |                                    |           |                  |           |
| $\sigma^2$                                              |                                   |           |                  | 0.1       |                                    |           |                  | 0.09      |
| $\tau_{00}$                                             | 0.01                              |           |                  |           | 0.01                               |           |                  |           |
| ICC                                                     |                                   |           |                  | 0.11      |                                    |           |                  | 0.12      |
| N                                                       | 66 Countries                      |           |                  |           | 65 Countries                       |           |                  |           |
| Observations                                            |                                   |           |                  | 47197     |                                    |           |                  | 46947     |
| Marginal R <sup>2</sup> / Conditional R <sup>2</sup>    | 0.079 / 0.181                     |           |                  |           | 0.222 / 0.319                      |           |                  |           |
| AIC                                                     |                                   |           |                  | 78059.397 |                                    |           |                  | 70978.492 |

Table S2. Weighted linear multilevel regression predicting policy support for heatwaves (random intercepts across countries)

| <i>Predictors</i>                                        | <b>Step 1: Exposed population</b> |           |                  |          | <b>Step 2: Moderation analyses</b> |           |                  |          |
|----------------------------------------------------------|-----------------------------------|-----------|------------------|----------|------------------------------------|-----------|------------------|----------|
|                                                          | <i>Beta</i>                       | <i>SE</i> | <i>Statistic</i> | <i>p</i> | <i>Beta</i>                        | <i>SE</i> | <i>Statistic</i> | <i>p</i> |
| Intercept                                                | 2.448                             | 0.015     | 167.397          | <.001    | 2.446                              | 0.015     | 166.278          | <.001    |
| Gender (male)                                            | 0                                 | 0.002     | -0.147           | .883     | 0.009                              | 0.002     | 5.251            | <.001    |
| Age                                                      | -0.015                            | 0.002     | -8.646           | <.001    | -0.013                             | 0.002     | -7.966           | <.001    |
| Education (tertiary)                                     | 0.038                             | 0.002     | 19.238           | <.001    | 0.032                              | 0.002     | 17.512           | <.001    |
| Income                                                   | 0.01                              | 0.002     | 5.127            | <.001    | 0.008                              | 0.002     | 4.399            | <.001    |
| Residence place (urban)                                  | 0.027                             | 0.002     | 14.24            | <.001    | 0.022                              | 0.002     | 12.516           | <.001    |
| Political orientation (right)                            | -0.056                            | 0.002     | -24.872          | <.001    | -0.036                             | 0.002     | -17.223          | <.001    |
| Political orientation (conservative)                     | -0.042                            | 0.002     | -18.514          | <.001    | -0.028                             | 0.002     | -13.389          | <.001    |
| Religiosity                                              | 0.024                             | 0.002     | 12.009           | <.001    | 0.019                              | 0.002     | 10.164           | <.001    |
| Exposed population to heatwaves                          | 0.008                             | 0.01      | 0.844            | .402     | 0.009                              | 0.01      | 0.905            | .369     |
| Subjective attribution                                   |                                   |           |                  |          | 0.152                              | 0.002     | 83.896           | <.001    |
| Exposed population to heatwaves * Subjective attribution |                                   |           |                  |          | 0.014                              | 0.003     | 5.079            | <.001    |
| Exposed population to heatwaves * Income                 |                                   |           |                  |          | -0.005                             | 0.002     | -1.909           | .056     |
| Exposed population to heatwaves * Residence (urban)      |                                   |           |                  |          | 0.004                              | 0.002     | 1.773            | .076     |
| <b>Random Effects</b>                                    |                                   |           |                  |          |                                    |           |                  |          |
| $\sigma^2$                                               | 0.1                               |           |                  |          | 0.09                               |           |                  |          |
| $\tau_{00}$                                              | 0.01                              |           |                  |          | 0.01                               |           |                  |          |
| ICC                                                      | 0.11                              |           |                  |          | 0.13                               |           |                  |          |
| N                                                        | 66 Countries                      |           |                  |          | 65 Countries                       |           |                  |          |
| Observations                                             | 47197                             |           |                  |          | 46964                              |           |                  |          |
| Marginal R <sup>2</sup> / Conditional R <sup>2</sup>     | 0.078 / 0.181                     |           |                  |          | 0.235 / 0.333                      |           |                  |          |
| AIC                                                      | 78060.363                         |           |                  |          | 70337.589                          |           |                  |          |

Table S3. Weighted linear multilevel regression predicting policy support for heavy precipitation (random intercepts across countries)

| <i>Predictors</i>                                                  | <b>Step 1: Exposed population</b> |           |                  |          | <b>Step 2: Moderation analyses</b> |           |                  |          |
|--------------------------------------------------------------------|-----------------------------------|-----------|------------------|----------|------------------------------------|-----------|------------------|----------|
|                                                                    | <i>Beta</i>                       | <i>SE</i> | <i>Statistic</i> | <i>p</i> | <i>Beta</i>                        | <i>SE</i> | <i>Statistic</i> | <i>p</i> |
| Intercept                                                          | 2.444                             | 0.014     | 172.426          | <.001    | 2.44                               | 0.014     | 177.269          | <.001    |
| Gender (male)                                                      | 0                                 | 0.002     | -0.142           | .887     | 0.009                              | 0.002     | 4.997            | <.001    |
| Age                                                                | -0.015                            | 0.002     | -8.645           | <.001    | -0.022                             | 0.002     | -12.948          | <.001    |
| Education (tertiary)                                               | 0.038                             | 0.002     | 19.248           | <.001    | 0.033                              | 0.002     | 17.821           | <.001    |
| Income                                                             | 0.01                              | 0.002     | 5.118            | <.001    | 0.009                              | 0.002     | 4.634            | <.001    |
| Residence place (urban)                                            | 0.027                             | 0.002     | 14.232           | <.001    | 0.023                              | 0.002     | 12.868           | <.001    |
| Political orientation (right)                                      | -0.056                            | 0.002     | -24.89           | <.001    | -0.04                              | 0.002     | -18.819          | <.001    |
| Political orientation (conservative)                               | -0.042                            | 0.002     | -18.493          | <.001    | -0.031                             | 0.002     | -14.589          | <.001    |
| Religiosity                                                        | 0.024                             | 0.002     | 11.998           | <.001    | 0.016                              | 0.002     | 8.767            | <.001    |
| Exposed population to heavy precipitation                          | -0.02                             | 0.01      | -2.12            | .037     | -0.02                              | 0.009     | -2.202           | .031     |
| Subjective attribution                                             |                                   |           |                  |          | 0.144                              | 0.002     | 77.703           | <.001    |
| Exposed population to heavy precipitation * Subjective attribution |                                   |           |                  |          | 0.011                              | 0.004     | 2.764            | .006     |
| Exposed population to heavy precipitation * Income                 |                                   |           |                  |          | -0.002                             | 0.004     | -0.58            | .562     |
| Exposed population to heavy precipitation * Residence (urban)      |                                   |           |                  |          | 0.005                              | 0.004     | 1.509            | .131     |
| <b>Random Effects</b>                                              |                                   |           |                  |          |                                    |           |                  |          |
| $\sigma^2$                                                         | 0.1                               |           |                  |          | 0.09                               |           |                  |          |
| $\tau_{00}$                                                        | 0.01                              |           |                  |          | 0.01                               |           |                  |          |
| ICC                                                                | 0.11                              |           |                  |          | 0.11                               |           |                  |          |
| N                                                                  | 66 Countries                      |           |                  |          | 65 Countries                       |           |                  |          |
| Observations                                                       | 47197                             |           |                  |          | 46958                              |           |                  |          |
| Marginal R <sup>2</sup> / Conditional R <sup>2</sup>               | 0.082 / 0.178                     |           |                  |          | 0.225 / 0.312                      |           |                  |          |
| AIC                                                                | 78056.738                         |           |                  |          | 71091.978                          |           |                  |          |

Table S4. Weighted linear multilevel regression predicting policy support for river floods (random intercepts across countries)

| <i>Predictors</i>                                     | <b>Step 1: Exposed population</b> |           |                  |          | <b>Step 2: Moderation analyses</b> |           |                  |          |
|-------------------------------------------------------|-----------------------------------|-----------|------------------|----------|------------------------------------|-----------|------------------|----------|
|                                                       | <i>Beta</i>                       | <i>SE</i> | <i>Statistic</i> | <i>p</i> | <i>Beta</i>                        | <i>SE</i> | <i>Statistic</i> | <i>p</i> |
| Intercept                                             | 2.442                             | 0.015     | 164.112          | <.001    | 2.437                              | 0.014     | 168.581          | <.001    |
| Gender (male)                                         | 0.000                             | 0.002     | -0.146           | .884     | 0.012                              | 0.002     | 6.727            | <.001    |
| Age                                                   | -0.015                            | 0.002     | -8.632           | <.001    | -0.023                             | 0.002     | -14.102          | <.001    |
| Education (tertiary)                                  | 0.038                             | 0.002     | 19.272           | <.001    | 0.032                              | 0.002     | 17.414           | <.001    |
| Income                                                | 0.01                              | 0.002     | 5.124            | <.001    | 0.006                              | 0.002     | 3.472            | .001     |
| Residence place (urban)                               | 0.027                             | 0.002     | 14.24            | <.001    | 0.023                              | 0.002     | 12.471           | <.001    |
| Political orientation (right)                         | -0.056                            | 0.002     | -24.875          | <.001    | -0.038                             | 0.002     | -18.201          | <.001    |
| Political orientation (conservative)                  | -0.042                            | 0.002     | -18.51           | <.001    | -0.029                             | 0.002     | -13.792          | <.001    |
| Religiosity                                           | 0.024                             | 0.002     | 12.005           | <.001    | 0.016                              | 0.002     | 8.657            | <.001    |
| Exposed population to floods                          | 0.016                             | 0.013     | 1.275            | .207     | 0.013                              | 0.012     | 1.094            | .278     |
| Subjective attribution                                |                                   |           |                  |          | 0.15                               | 0.002     | 79.847           | <.001    |
| Exposed population to floods * Subjective attribution |                                   |           |                  |          | -0.017                             | 0.002     | -7.632           | <.001    |
| Exposed population to floods * Income                 |                                   |           |                  |          | -0.008                             | 0.002     | -3.971           | <.001    |
| Exposed population to floods * Residence (urban)      |                                   |           |                  |          | 0.006                              | 0.002     | 2.801            | .005     |
| <b>Random Effects</b>                                 |                                   |           |                  |          |                                    |           |                  |          |
| $\sigma^2$                                            | 0.1                               |           |                  |          | 0.09                               |           |                  |          |
| $\tau_{00}$                                           | 0.01                              |           |                  |          | 0.01                               |           |                  |          |
| ICC                                                   | 0.11                              |           |                  |          | 0.12                               |           |                  |          |
| N                                                     | 66 Countries                      |           |                  |          | 65 Countries                       |           |                  |          |
| Observations                                          | 47197                             |           |                  |          | 46964                              |           |                  |          |
| Marginal R <sup>2</sup> / Conditional R <sup>2</sup>  | 0.080 / 0.181                     |           |                  |          | 0.236 / 0.327                      |           |                  |          |
| AIC                                                   | 78058.988                         |           |                  |          | 70239.349                          |           |                  |          |

Table S5. Weighted linear multilevel regression predicting policy support for wildfires (random intercepts across countries)

| <i>Predictors</i>                                        | <b>Step 1: Exposed population</b> |           |                  |          | <b>Step 2: Moderation analyses</b> |           |                  |          |
|----------------------------------------------------------|-----------------------------------|-----------|------------------|----------|------------------------------------|-----------|------------------|----------|
|                                                          | <i>Beta</i>                       | <i>SE</i> | <i>Statistic</i> | <i>p</i> | <i>Beta</i>                        | <i>SE</i> | <i>Statistic</i> | <i>p</i> |
| Intercept                                                | 2.439                             | 0.015     | 166.725          | <.001    | 2.435                              | 0.014     | 169.736          | <.001    |
| Gender (male)                                            | 0.000                             | 0.002     | -0.137           | .891     | 0.009                              | 0.002     | 4.935            | <.001    |
| Age                                                      | -0.015                            | 0.002     | -8.619           | <.001    | -0.017                             | 0.002     | -9.931           | <.001    |
| Education (tertiary)                                     | 0.038                             | 0.002     | 19.293           | <.001    | 0.034                              | 0.002     | 18.098           | <.001    |
| Income                                                   | 0.01                              | 0.002     | 5.122            | <.001    | 0.01                               | 0.002     | 5.254            | <.001    |
| Residence place (urban)                                  | 0.027                             | 0.002     | 14.235           | <.001    | 0.021                              | 0.002     | 11.66            | <.001    |
| Political orientation (right)                            | -0.056                            | 0.002     | -24.871          | <.001    | -0.039                             | 0.002     | -18.414          | <.001    |
| Political orientation (conservative)                     | -0.042                            | 0.002     | -18.514          | <.001    | -0.031                             | 0.002     | -14.319          | <.001    |
| Religiosity                                              | 0.024                             | 0.002     | 12.011           | <.001    | 0.018                              | 0.002     | 9.593            | <.001    |
| Exposed population to wildfires                          | 0.027                             | 0.013     | 2.002            | .049     | 0.027                              | 0.013     | 2.085            | .041     |
| Subjective attribution                                   |                                   |           |                  |          | 0.139                              | 0.002     | 73.62            | <.001    |
| Exposed population to wildfires * Subjective attribution |                                   |           |                  |          | -0.026                             | 0.002     | -12.265          | <.001    |
| Exposed population to wildfires * Income                 |                                   |           |                  |          | 0.007                              | 0.002     | 3.342            | .001     |
| Exposed population to wildfires * Residence (urban)      |                                   |           |                  |          | -0.002                             | 0.002     | -0.839           | .402     |
| <b>Random Effects</b>                                    |                                   |           |                  |          |                                    |           |                  |          |
| $\sigma^2$                                               | 0.1                               |           |                  |          | 0.09                               |           |                  |          |
| $\tau_{00}$                                              | 0.01                              |           |                  |          | 0.01                               |           |                  |          |
| ICC                                                      | 0.11                              |           |                  |          | 0.11                               |           |                  |          |
| N                                                        | 66 Countries                      |           |                  |          | 65 Countries                       |           |                  |          |
| Observations                                             | 47197                             |           |                  |          | 46954                              |           |                  |          |
| Marginal R <sup>2</sup> / Conditional R <sup>2</sup>     | 0.083 / 0.181                     |           |                  |          | 0.221 / 0.311                      |           |                  |          |
| AIC                                                      | 78056.549                         |           |                  |          | 70915.9                            |           |                  |          |

Table S6. Weighted linear multilevel regression predicting policy support for tropical cyclones (random intercepts across countries)

| <i>Predictors</i>                                       | <b>Step 1: Exposed population</b> |           |                  |          | <b>Step 2: Moderation analyses</b> |           |                  |          |
|---------------------------------------------------------|-----------------------------------|-----------|------------------|----------|------------------------------------|-----------|------------------|----------|
|                                                         | <i>Beta</i>                       | <i>SE</i> | <i>Statistic</i> | <i>p</i> | <i>Beta</i>                        | <i>SE</i> | <i>Statistic</i> | <i>p</i> |
| Intercept                                               | 2.446                             | 0.015     | 168.273          | <.001    | 2.442                              | 0.014     | 171.197          | <.001    |
| Gender (male)                                           | 0.000                             | 0.002     | -0.148           | .882     | 0.01                               | 0.002     | 5.54             | <.001    |
| Age                                                     | -0.015                            | 0.002     | -8.641           | <.001    | -0.022                             | 0.002     | -13.016          | <.001    |
| Education (tertiary)                                    | 0.038                             | 0.002     | 19.237           | <.001    | 0.033                              | 0.002     | 17.884           | <.001    |
| Income                                                  | 0.01                              | 0.002     | 5.125            | <.001    | 0.007                              | 0.002     | 3.913            | <.001    |
| Residence place (urban)                                 | 0.027                             | 0.002     | 14.238           | <.001    | 0.022                              | 0.002     | 12.715           | <.001    |
| Political orientation (right)                           | -0.056                            | 0.002     | -24.872          | <.001    | -0.039                             | 0.002     | -18.407          | <.001    |
| Political orientation (conservative)                    | -0.042                            | 0.002     | -18.514          | <.001    | -0.03                              | 0.002     | -14.138          | <.001    |
| Religiosity                                             | 0.024                             | 0.002     | 12.01            | <.001    | 0.016                              | 0.002     | 8.865            | <.001    |
| Exposed population to cyclones                          | 0.011                             | 0.013     | 0.823            | .414     | 0.011                              | 0.013     | 0.832            | .409     |
| Subjective attribution                                  |                                   |           |                  |          | 0.148                              | 0.002     | 81.581           | <.001    |
| Exposed population to cyclones * Subjective attribution |                                   |           |                  |          | 0.014                              | 0.002     | 7.615            | <.001    |
| Exposed population to cyclones * Income                 |                                   |           |                  |          | -0.001                             | 0.002     | -0.46            | .645     |
| Exposed population to cyclones * Residence (urban)      |                                   |           |                  |          | -0.001                             | 0.002     | -0.796           | .426     |
| <b>Random Effects</b>                                   |                                   |           |                  |          |                                    |           |                  |          |
| $\sigma^2$                                              | 0.1                               |           |                  |          | 0.09                               |           |                  |          |
| $\tau_{00}$                                             | 0.01                              |           |                  |          | 0.01                               |           |                  |          |
| ICC                                                     | 0.11                              |           |                  |          | 0.12                               |           |                  |          |
| N                                                       | 66 Countries                      |           |                  |          | 65 Countries                       |           |                  |          |
| Observations                                            | 47197                             |           |                  |          | 46961                              |           |                  |          |
| Marginal R <sup>2</sup> / Conditional R <sup>2</sup>    | 0.079 / 0.181                     |           |                  |          | 0.230 / 0.322                      |           |                  |          |
| AIC                                                     | 78059.805                         |           |                  |          | 70746.166                          |           |                  |          |

Table S7. Weighted linear multilevel regression predicting policy support for European winter storms (random intercepts across countries)

| <i>Predictors</i>                                           | <b>Step 1: Exposed population</b> |           |                  |          | <b>Step 2: Moderation analyses</b> |           |                  |          |
|-------------------------------------------------------------|-----------------------------------|-----------|------------------|----------|------------------------------------|-----------|------------------|----------|
|                                                             | <i>Beta</i>                       | <i>SE</i> | <i>Statistic</i> | <i>p</i> | <i>Beta</i>                        | <i>SE</i> | <i>Statistic</i> | <i>p</i> |
| Intercept                                                   | 2.444                             | 0.015     | 164.292          | <.001    | 2.44                               | 0.015     | 167.021          | <.001    |
| Gender (male)                                               | 0                                 | 0.002     | -0.144           | .885     | 0.01                               | 0.002     | 5.630            | <.001    |
| Age                                                         | -0.015                            | 0.002     | -8.636           | <.001    | -0.022                             | 0.002     | -13.084          | <.001    |
| Education (tertiary)                                        | 0.038                             | 0.002     | 19.259           | <.001    | 0.033                              | 0.002     | 17.771           | <.001    |
| Income                                                      | 0.01                              | 0.002     | 5.125            | <.001    | 0.008                              | 0.002     | 4.210            | <.001    |
| Residence place (urban)                                     | 0.027                             | 0.002     | 14.239           | <.001    | 0.022                              | 0.002     | 12.574           | <.001    |
| Political orientation (right)                               | -0.056                            | 0.002     | -24.871          | <.001    | -0.039                             | 0.002     | -18.199          | <.001    |
| Political orientation (conservative)                        | -0.042                            | 0.002     | -18.514          | <.001    | -0.031                             | 0.002     | -14.352          | <.001    |
| Religiosity                                                 | 0.024                             | 0.002     | 12.009           | <.001    | 0.016                              | 0.002     | 8.878            | <.001    |
| Exposed population to winterstorms                          | -0.013                            | 0.016     | -0.827           | .412     | -0.011                             | 0.015     | -0.733           | .466     |
| Subjective attribution                                      |                                   |           |                  |          | 0.148                              | 0.002     | 80.663           | <.001    |
| Exposed population to winterstorms * Subjective attribution |                                   |           |                  |          | 0.009                              | 0.002     | 4.872            | <.001    |
| Exposed population to winterstorms * Income                 |                                   |           |                  |          | -0.003                             | 0.002     | -1.833           | .067     |
| Exposed population to winterstorms * Residence (urban)      |                                   |           |                  |          | 0.002                              | 0.002     | 1.055            | .291     |
| <b>Random Effects</b>                                       |                                   |           |                  |          |                                    |           |                  |          |
| $\sigma^2$                                                  | 0.1                               |           |                  |          | 0.09                               |           |                  |          |
| $\tau_{00}$                                                 | 0.01                              |           |                  |          | 0.01                               |           |                  |          |
| ICC                                                         | 0.11                              |           |                  |          | 0.12                               |           |                  |          |
| N                                                           | 66 Countries                      |           |                  |          | 65 Countries                       |           |                  |          |
| Observations                                                | 47197                             |           |                  |          | 46961                              |           |                  |          |
| Marginal R <sup>2</sup> / Conditional R <sup>2</sup>        | 0.079 / 0.182                     |           |                  |          | 0.228 / 0.321                      |           |                  |          |
| AIC                                                         | 78059.482                         |           |                  |          | 70776.196                          |           |                  |          |

Table S8. Weighted linear multilevel regression predicting mean level of subjective attribution across events (random intercepts across countries)

| <i>Predictors</i>                                    | <b>Mean subjective attribution</b> |           |          |          |
|------------------------------------------------------|------------------------------------|-----------|----------|----------|
|                                                      | <i>Beta</i>                        | <i>SE</i> | <i>t</i> | <i>p</i> |
| Intercept                                            | 3.887                              | 0.039     | 99.468   | <.001    |
| Gender (male)                                        | -0.074                             | 0.005     | -16.445  | <.001    |
| Age                                                  | 0.029                              | 0.004     | 6.879    | <.001    |
| Education (tertiary)                                 | 0.044                              | 0.005     | 9.353    | <.001    |
| Income                                               | 0.014                              | 0.005     | 3.120    | .002     |
| Residence place (urban)                              | 0.031                              | 0.004     | 6.934    | <.001    |
| Political orientation (right)                        | -0.132                             | 0.005     | -25.085  | <.001    |
| Political orientation<br>(conservative)              | -0.092                             | 0.005     | -17.352  | <.001    |
| Religiosity                                          | 0.053                              | 0.005     | 11.352   | <.001    |
| <b>Random Effects</b>                                |                                    |           |          |          |
| $\sigma^2$                                           | 0.57                               |           |          |          |
| $\tau_{00}$ COUNTRY_NAME                             | 0.1                                |           |          |          |
| ICC                                                  | 0.14                               |           |          |          |
| N COUNTRY_NAME                                       | 67                                 |           |          |          |
| Observations                                         | 48292                              |           |          |          |
| Marginal R <sup>2</sup> / Conditional R <sup>2</sup> | 0.065 / 0.199                      |           |          |          |
| AIC                                                  | 163225.172                         |           |          |          |

Table S9. Mean and standard deviation for extreme weather event variables.

| <b>Extreme weather events</b> | <b>Mean</b> | <b>SD</b> |
|-------------------------------|-------------|-----------|
| Droughts                      | 0.067       | 0.102     |
| Heatwaves                     | 0.996       | 0.028     |
| Heavy precipitation           | 0.999       | 0.003     |
| Floods                        | 0.077       | 0.079     |
| Tropical Cyclones             | 0.089       | 0.223     |
| Wildfires                     | 0.291       | 0.252     |
| European winterstorms         | 0.104       | 0.194     |

*Note:* A mean value of 1 corresponds to 100% exposed population, while a value of 0 corresponds to 0% exposed population.

Table S10. Reliability (omega) of subjective attribution scale across 67 countries in ascending order

| <b>Country</b> | <b>Omega</b> | <b>Country</b> | <b>Omega</b> |
|----------------|--------------|----------------|--------------|
| Kenya          | 0.744        | Japan          | 0.895        |
| Uganda         | 0.752        | New Zealand    | 0.896        |
| Cameroon       | 0.761        | Colombia       | 0.900        |
| Bangladesh     | 0.773        | Georgia        | 0.902        |
| Ghana          | 0.778        | Bulgaria       | 0.904        |
| Côte d'Ivoire  | 0.786        | Serbia         | 0.905        |
| Morocco        | 0.790        | Mexico         | 0.906        |
| Nigeria        | 0.793        | Russia         | 0.906        |
| Ethiopia       | 0.800        | Romania        | 0.912        |
| Bolivia        | 0.803        | Israel         | 0.913        |
| India          | 0.814        | Italy          | 0.914        |
| Botswana       | 0.817        | Uruguay        | 0.916        |
| Congo DR       | 0.821        | Switzerland    | 0.919        |
| Indonesia      | 0.823        | Denmark        | 0.921        |
| Chile          | 0.823        | France         | 0.921        |
| Peru           | 0.823        | Greece         | 0.921        |
| China          | 0.832        | United Kingdom | 0.923        |
| Egypt          | 0.835        | Finland        | 0.926        |
| Nicaragua      | 0.842        | Poland         | 0.926        |
| Kazakhstan     | 0.843        | Portugal       | 0.927        |
| Hungary        | 0.844        | Slovakia       | 0.928        |
| Ukraine        | 0.846        | Belgium        | 0.929        |
| Philippines    | 0.852        | Cyprus         | 0.931        |
| Malaysia       | 0.854        | Australia      | 0.933        |
| Hong Kong      | 0.856        | Netherlands    | 0.936        |
| South Korea    | 0.861        | Austria        | 0.936        |
| Türkiye        | 0.862        | Canada         | 0.938        |
| Taiwan         | 0.866        | Slovenia       | 0.938        |
| Brazil         | 0.876        | Norway         | 0.939        |
| South Africa   | 0.881        | Germany        | 0.942        |
| Ireland        | 0.885        | Spain          | 0.944        |
| Costa Rica     | 0.885        | Sweden         | 0.945        |
| Czech Republic | 0.887        | United States  | 0.949        |
| Argentina      | 0.888        |                |              |

Table S11. Reliability (omega) of aggregate policy support scale across 66 countries in ascending order

| <b>Country</b> | <b>Omega</b> | <b>Country</b> | <b>Omega</b> |
|----------------|--------------|----------------|--------------|
| Ukraine        | 0.404        | Slovenia       | 0.597        |
| Côte d'Ivoire  | 0.440        | Sweden         | 0.602        |
| Australia      | 0.477        | Slovakia       | 0.617        |
| New Zealand    | 0.484        | Nicaragua      | 0.618        |
| Kenya          | 0.489        | Botswana       | 0.619        |
| Russia         | 0.491        | Germany        | 0.623        |
| Switzerland    | 0.509        | Canada         | 0.624        |
| Belgium        | 0.514        | Morocco        | 0.624        |
| Romania        | 0.528        | Colombia       | 0.628        |
| Austria        | 0.531        | Israel         | 0.631        |
| Cameroon       | 0.533        | Serbia         | 0.632        |
| Egypt          | 0.536        | Ireland        | 0.639        |
| Hong Kong      | 0.542        | Nigeria        | 0.642        |
| Costa Rica     | 0.545        | Italy          | 0.643        |
| India          | 0.552        | Indonesia      | 0.643        |
| Bulgaria       | 0.554        | Uganda         | 0.648        |
| Taiwan         | 0.555        | Mexico         | 0.651        |
| China          | 0.559        | Spain          | 0.656        |
| Czech Republic | 0.560        | Kazakhstan     | 0.659        |
| Finland        | 0.565        | Ghana          | 0.660        |
| Netherlands    | 0.570        | United Kingdom | 0.661        |
| Chile          | 0.570        | Brazil         | 0.667        |
| France         | 0.572        | Uruguay        | 0.674        |
| Norway         | 0.578        | Albania        | 0.696        |
| South Africa   | 0.584        | Georgia        | 0.701        |
| South Korea    | 0.588        | Ethiopia       | 0.702        |
| Poland         | 0.590        | Congo DR       | 0.705        |
| Philippines    | 0.591        | United States  | 0.710        |
| Bangladesh     | 0.592        | Bolivia        | 0.714        |
| Denmark        | 0.592        | Hungary        | 0.717        |
| Japan          | 0.595        | Türkiye        | 0.732        |
| Greece         | 0.595        | Portugal       | 0.736        |
| Cyprus         | 0.595        | Peru           | 0.753        |

Table S12. Polychoric exploratory factor analysis (EFA) with items measuring climate policy support

|                                                                        | <b>Factor 1</b><br><b>“Green transition”</b> | <b>Factor 2</b><br><b>“Taxes”</b> |
|------------------------------------------------------------------------|----------------------------------------------|-----------------------------------|
| Raising carbon taxes on fossil fuels (e.g., gas or coal)               |                                              | 0.90                              |
| Expanding infrastructure for public transportation                     | 0.56                                         |                                   |
| Increasing the use of sustainable energy such as wind and solar energy | 0.78                                         |                                   |
| Protecting forested and land areas                                     | 0.85                                         |                                   |
| Increasing taxes on carbon intense foods                               |                                              | 0.78                              |

*Note:* EFA was performed with unweighted least squares factoring and promax oblique rotation. Factor loadings < .20 are omitted.

Table S13. Definitions of extreme weather events and data sources.

| <b>Hazard</b>      | <b>Years</b> | <b>Hazard variable/definition</b>                                                                                                                                                                                                                                                               | <b>Data source</b>                            | <b>Additional information</b>                                                                                                                                                                                    |
|--------------------|--------------|-------------------------------------------------------------------------------------------------------------------------------------------------------------------------------------------------------------------------------------------------------------------------------------------------|-----------------------------------------------|------------------------------------------------------------------------------------------------------------------------------------------------------------------------------------------------------------------|
| <b>Drought</b>     | 1980-2005    | led = annual land area fraction exposed to drought as hazard variable in CLIMADA; Entire grid cell if monthly soil moisture falls below the 2.5th percentile (Klein Goldewijk et al., 2017) of the preindustrial baseline distribution for at least seven consecutive months.                   | ISIMIP 2a/Lange et al. (2020)                 | Output of 6 (historical) global hydrological models x 4 climate models (GCMs) = 24 ensembles were used to calculate the multimodel median; "histsoc" (varying direct human influences in the historical period). |
| <b>River Flood</b> | 1980-1999    | Maximal annual river flood depth at each location as hazard variable in CLIMADA; Grid cell fraction with depth exceeding 1m (used for instance as threshold for displacement Kam et al. (2021)).                                                                                                | CLIMADA API / ISIMIP 2a / Sauer et al. (2021) | 46 ensembles for historical were used (combination of GCMs and hydrological models) to calculate the multimodel median.                                                                                          |
| <b>Heatwaves</b>   | 2000-2019    | Increase in number of heat days per year. A heat day is defined as daily mean temperature exceeds the 99th percentile of the reference period 1980-1999 and is warmer than 15°C. To only display the increase, the expected 73 (20*365*0.01) days exceeding the 99th percentile are subtracted. | ERA5 reanalysis data (Hersbach et al., 2020)  |                                                                                                                                                                                                                  |

|                              |           |                                                                                                                                                                                                                                                                                                                                                      |                                                         |                                                                                                                                                        |
|------------------------------|-----------|------------------------------------------------------------------------------------------------------------------------------------------------------------------------------------------------------------------------------------------------------------------------------------------------------------------------------------------------------|---------------------------------------------------------|--------------------------------------------------------------------------------------------------------------------------------------------------------|
| <b>Heavy precipitation</b>   | 2000-2019 | Increase in number of heavy precipitation days per year. A heavy precip day is defined as daily mean precipitation that exceeds the 99th percentile of the reference period 1980-1999 and is more intense than 5mm. To only display the increase, the expected 73 ( $20 \times 365 \times 0.01$ ) days exceeding the 99th percentile are subtracted. | ERA5 reanalysis data (Hersbach et al., 2020)            |                                                                                                                                                        |
| <b>Wildfires</b>             | 2000-2020 | 2000-2020<br>Satellite imagery derived thermal anomaly; annual maximum; grid cell counts as affected if temperature > 300K<br>Lüthi et al. (2021)                                                                                                                                                                                                    | CLIMADA API / Lüthi et al. (2021)<br>(FIRMS/MODIS data) | Output of 4 GCMS x 5 vegetation models = 20 ensembles were used to calculate the multimodel median.                                                    |
| <b>Tropical cyclones</b>     | 2000-2019 | People affected by Cat. 1 tropical cyclones and stronger (> 33m/s wind speed).                                                                                                                                                                                                                                                                       | IBTrACS/Knapp et al. (2010)                             | Observed tropical cyclones                                                                                                                             |
| <b>European Winterstorms</b> | 1994-2014 | People affected by windspeeds of tropical Cat 1 category or stronger (to insure compatibility with TCs). Only modelled for countries:<br>'ALB', 'AUT', 'BEL', 'DNK', 'FIN', 'FRA', 'DEU', 'GRC', 'HUN', 'IRL', 'ITA', 'MAR', 'NLD', 'POL', 'ROU', 'SVK', 'SVN', 'ESP', 'SWE', 'CHE', 'TUR', 'UKR', 'GBR'                                             | CLIMADA API / Rösli (2021)<br>(WISC data)               | Observed winter storms. Data aggregated over 3 days, so for instance the storms Lothar on 26.12.1999 and Martin on 27.12.1999 are counted only as one. |

**The following members of the TISP Consortium are not listed as co-authors:**

Marlene Altenmüller, Richard Amoako, Cornelia Betsch, Apurav Yash Bhatiya, Steven De Peuter, Tom W. Etienne, Simon Fuglsang, Winfred Gatua, Mario Gollwitzer, Gina M. Grimshaw, Lelia N. Hawkins, Maho Ishibashi, Younes Jeddi, Zhangir Kabdulkair, Jo-Ju Kao, Eleni A. Kyza, Hugo Mercier, Julia Metag, Iryna Mudra, Jaime Palmer-Hague, Myron A. Penner, Jan Pfänder, Cintia Refojo Seronero, Simone Rödder, Philipp Schmid, Bermond Scoggins, Amena Sharaf, Justin Sheria Nfundiko, Olivier Standaert, Gert Storms, Christiana Varda, Steven Verheyen, Iain Walker, Marcel Weber, Florian Wintterlin, Rolf A. Zwaan

Reference

Auguie, A., Goldie, J., & Thériault, R. (2024). *ggflags: Plot flags of the world in ggplot2* (Version R package version 0.0.4). <https://github.com/rensa/ggflags>
